# Supplementary material for: Evaluating the Effect of Deficit Irrigation on Yield and Water Use Efficiency of Drip Irrigation Cotton under Film in Xinjiang Based on Meta-Analysis
Source: MDPI journal article supplement (doi:10.3390/plants13050640), 2024-02-26
Supplement: s1 [file s1]

## Supplementary material

Evaluating the effect of deficit irrigation on yield and water use efficiency of drip irrigation cotton under film in Xinjiang based on Meta-analysis

Qi Xu<sup>1,2†</sup>, Xiaomei Dong<sup>1†</sup>, Weixiong Huang<sup>1,3</sup>, Zhaoyang Li<sup>1,2</sup>, Tongtong Huang<sup>1</sup>, Zaijin Song<sup>4</sup>, Yuhui Yang<sup>1,2\*</sup> and Jinsai Chen<sup>5\*</sup>,

1 College of Water Conservancy and Architectural Engineering, Tarim University, Alar 843300, China; 10757222200@stumail.taru.edu.cn (Q.X.); 120130023@taru.edu.cn (X.D.); huangwx@cug.edu.cn (W.H.); 120130021@taru.edu.cn (Z.L.); 10757223118@stumail.taru.edu.cn (T.H.)

2 Key Laboratory of Modern Agricultural Engineering, Tarim University, Alar 843300, China

3 MOE Key Laboratory of Groundwater Quality and Health, School of Environmental Studies, China University of Geosciences, Wuhan 430078, China

4 Beijing City University, Beijing 100193, China; songzaijin@bcu.edu.cn

5 College of Agronomy and Biotechnology, China Agricultural University, Beijing 100193, China

\* Correspondence: 120130022@taru.edu.cn (Y.Y.); jinsaichen@cau.edu.cn (J.C.)

† These authors contributed equally to this work.

- 1 S1 Classification of variables
- 2 Fig. S1 Literature Screening Flowchart
- 3 Table S1 Description of categorical variables
- 4 Table S2 Sample size and significance test for categorical variables
- 5 Table S3 Distribution of titles and locations of literature included in the database

## S1 Classification of variables

In this study, twelve variables were evaluated based on the availability of the dataset and combined with previous categorizations. Irrigation amount (40~60% FI, 60~80% FI, 80~100% FI), irrigation frequency ( $<10$ ,  $\geq 10$ ), nitrogen application ( $\leq 200$ , 200~300, 300~400,  $>400$ ), planting density ( $<240000$ ,  $\geq 240000$ ), average annual temperature ( $\leq 10$ ,  $>10$ ), average annual precipitation ( $<60$ , 60~200,  $>200$ ), average annual evapotranspiration (1500~2000,  $>2000$ ), initial soil organic carbon content ( $\leq 5.8$ , 5.8~11.6), and initial soil available nitrogen content ( $\leq 60$ , 60~120), of which the drip tape mode, variety and soil texture were categorized according to the different categories in the available database. Soil organic matter was categorized as  $\leq 5$ , 5~10, 10~15, 15~20,  $>20$  g/kg. In this study, soil organic carbon was analyzed, and according to the "Van Bemmelen" factor, soil organic carbon=soil organic matter\*0.58, and according to references, soil organic matter was categorized as  $\leq 10$ , 10~20, which was converted to  $\leq 5.8$ , 5.8~11.6.

**Reference:** Bian, Q.Q.; Wang, Y.N.; Chen, J.J.; Qiao, S.C.; Hu, L.L.; Yin, Y.M.; Yang, X. P.; Yang, Y.F. Effects of potassium application on yield and potassium balance of sweet potato field in China: A meta-analysis. *J. Plant Nutr. Fertil.* 2022, 28, 1509–1519. <https://doi.org/10.11674/zwjyf.2021632>. (Reference is cited in the text)

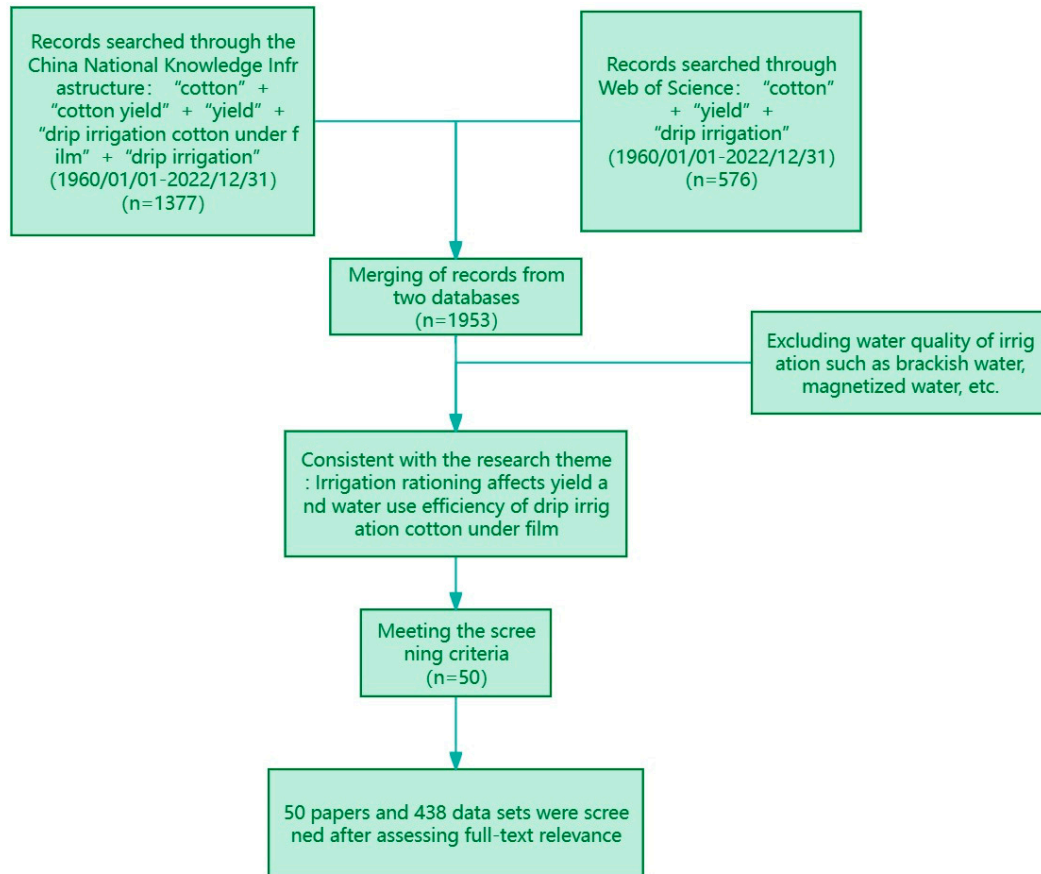

Figure S1 Literature Screening Flowchart

Figure S1 shows the flowchart of screening literature for this study. The screening criteria followed in this study were (1) the test site should be a field trial within the scope of Xinjiang, potting and indoor trials should be excluded, and the test object should be cotton; (2) the number of trial replicates should be  $\geq 3$ ; (3) cotton yields recorded in the study cases were seed cotton yields; (4) multiple replicated observations under the same treatment were averaged; (5) when there were studies with additional factor effects in the trials, they were considered as independent trials separately included in the database; (6) for multi-year experimental studies in the same region in the literature, they were considered to be mutually independent trials separately included in the database.

Table S1 Description of categorical variables

| Category               | Variable                         | Unit      |
|------------------------|----------------------------------|-----------|
| Management measures    | Irrigation amount                | %         |
|                        | Irrigation frequency: IF         | times     |
|                        | Nitrogen application rate : NAR  | kg/ha     |
|                        | Planting density: PD             | plants/ha |
| Climate                | Average annual temperature: AT   | °C        |
|                        | Average annual precipitation: AP | mm        |
|                        | Average annual evaporation: AE   | mm        |
|                        |                                  |           |
| Initial soil fertility | Soil organic carbon: SOC         | g/kg      |
|                        | Soil available nitrogen: SAN     | mg/kg     |

Table S2 Sample size and significance test for categorical variables

| Categorical variables     | Data sample size: cotton yield | Data sample size: water use efficiency | Significance test: cotton yield | Significance test: water use efficiency |
|---------------------------|--------------------------------|----------------------------------------|---------------------------------|-----------------------------------------|
| Irrigation amount         | 276                            | 167                                    | 0.001                           | 0.001                                   |
| Drip tape mode            | 181                            | 114                                    | 0.001                           | 0.001                                   |
| Irrigation frequency      | 222                            | 133                                    | 0.142                           | 0.012                                   |
| Nitrogen application rate | 205                            | 142                                    | 0.722                           | 0.005                                   |
| Variety                   | 215                            | 137                                    | 0.001                           | 0.001                                   |
| Planting density          | 57                             | 18                                     | 0.001                           | 0.982                                   |
| Annual temperature        | 108                            | 60                                     | 0.001                           | 0.001                                   |
| Annual evaporation        | 112                            | 35                                     | 0.133                           | 0.207                                   |
| Annual precipitation      | 245                            | 163                                    | 0.001                           | 0.001                                   |
| Soil texture              | 223                            | 157                                    | 0.105                           | 0.696                                   |
| Soil organic carbon       | 152                            | 93                                     | 0.862                           | 0.001                                   |
| Soil available nitrogen   | 153                            | 93                                     | 0.066                           | 0.503                                   |

Table S3 Distribution of titles and locations of literature included in the database

| Author       | Literature titles                                                                                                                             | Study site distribution                                                                                                            |
|--------------|-----------------------------------------------------------------------------------------------------------------------------------------------|------------------------------------------------------------------------------------------------------------------------------------|
| Shen Xiaojun | Effects of different water treatments on yield and water use efficiency of cotton with drip irrigation under film mulch                       | The test base of the Irrigation Test Center Station of the Xinjiang Production and Construction Corps                              |
| He Pingru    | Effects of soil moisture regulation on growth,quality and water use of cotton under drip irrigation in southern Xinjiang                      | Yuli County, Korla City, Xinjiang                                                                                                  |
| Wang Cheng   | Soil salt transfer law and water consumption characteristics for cotton with drip irrigation under mulch with dry sowing and wet seedling     | Water-saving Irrigation Experimental Base of School of Water Conservancy and Architectural Engineering, Tarim University, Xinjiang |
| Yi Pengfei   | Schedule optimization of under-plastic-mulch drip irrigation for cotton in arid areas                                                         | Key Experimental Station of Agricultural Water-saving Irrigation in Arid Area of Shihezi University                                |
| Pan Junjie   | Effects of irrigation limits at bud stage and flowering stage on yield of drip irrigation cotton                                              | Modern irrigation demonstration site in Dafeng Town, Hutubi County, Changji Prefecture                                             |
| WangXiuyuan  | Responses of cotton canopy structure characteristics to drip irrigation quota in north XinJiang,China                                         | Shihezi University Experimental Station                                                                                            |
| Dou Qiaoqiao | Effect of reduced drip irrigation on photosynthetic characteristics and yield of cotton during flowering and bollstagein in Northern Xinjiang | Qubian Village, Shawan County, Xinjiang                                                                                            |
| Han Xiufeng  | Effect of under-mulch-drip irrigation on canopy photosynthesis, canopy structure and yield of hybrid cotton in Xinjiang                       | Experimental Station of the School of Water Conservancy and Architecture, Tarim University                                         |
| Wu Fengquan  | Effect of plastic film on evapotranspiration and evaporation of cottons under drip irrigation in southern XinJiang                            | Awati County, Aksu City, Xinjiang Uygur Autonomous Region                                                                          |
| Li Nannan    | Effects of drip irrigation quota on plant shape,yield and fiber quality of cotton                                                             | Agronomy Experimental Station of Shihezi University                                                                                |
| Cui Jianping | Influence of different quantities under drip irrigation mode on the long-staple cotton growth and yield                                       | Awati County, Xinjiang                                                                                                             |
| Wang Jichuan | Influence of different drip irrigation amount on canopy structure of hybrid cotton                                                            | Experimental Station of the Institute of Water Construction, Tarim University                                                      |
| Wang Jichuan | Effects of irrigation schedule on photosynthetic characteristic and yield components in hybrid cotton Zhaofeng                                | Experimental Station of the Institute of Water Construction, Tarim University                                                      |
| Gao Shan     | Effects of drip irrigation under mulchr on canopy apparent photosynthesis and yield structure of hybrid cotton Zhao feng 1 in south Xinjiang  | *                                                                                                                                  |
| Li Fangsong  | Irrigation schedule of drip irrigation of machine-harvested cotton in Hutubi country                                                          | Hongliutang Village, Dafeng Town, Hutubi County, Xinjiang                                                                          |

|               |                                                                                                                                                              |                                                                                                                                                          |
|---------------|--------------------------------------------------------------------------------------------------------------------------------------------------------------|----------------------------------------------------------------------------------------------------------------------------------------------------------|
| Wang Liang    | Effects of irrigation quota on water use efficiency and yield of cotton field under subsoiling tillage                                                       | Experimental base of Xinjiang Awati County Academy of Agricultural Sciences                                                                              |
| Dou Qiaoqiao  | Effect of reduced amount drip irrigation during the flowering and boll-forming on the development of cotton boll and its leaf photosynthetic characteristics | Qubian Village, Sidahezi Town, Shawan County, Xinjiang                                                                                                   |
| Fan Kai       | Experimental research on suitable irrigation management based on meteorological information for film mulched drip irrigation cotton in southern Xinjiang     | Soil and Water Conservation Experimental Station of the Water Conservancy Bureau of the First Division of the Xinjiang Production and Construction Corps |
| Zhao Yongming | Real-time monitor of soil water potential under cotton membrane drip and research on cotton irrigation schedule                                              | Shihezi Institute of Arid Agriculture                                                                                                                    |
| Li Nan        | Study on the drip irrigation system and the location of soil moisture measuring points under the mulch of mechanized cotton in the south Xinjiang            | Irrigation Experimental Station of the Water Conservancy Bureau of the First Division of the Xinjiang Production and Construction Corps                  |
| Yang Ying     | Effect of water deficit on canopy photosynthetic properties of every green organs in cotton                                                                  | Agronomy Experimental Station of Shihezi University                                                                                                      |
| He Pingru     | Effects of soil water regulation on cotton growth and soil water salt fertilizer transportation under drip irrigation in southern Xinjian                    | Yuli County, Korla City, Xinjiang                                                                                                                        |
| Wang Feng     | Effect of irrigation scheduling on growth,yield,and fiber quality of cotton under mechanical harvest cropping model                                          | Aksu National Field Scientific Observation and Research Station of Farmland Ecosystem, Chinese Academy of Sciences                                       |
| Xing Xiaoning | Effects of different irrigation regimes on cotton growth and yield with drip irrigation under plastic film in oasis region of south Xinjiang                 | Hydraulic and Architectural Engineering, Tarim University<br>The test base of the hospital                                                               |
| Wu Lifeng     | Effect of drip irrigation and fertilizer application on water use efficiency and cotton yield in North of Xinjiang                                           | Water-saving Irrigation Experimental Station of Xinjiang Academy of Agricultural and Reclamation Sciences                                                |
| Wu Lifeng     | Effects of water and fertilizer coupling on cotton yield, net benefits and water use efficiency                                                              | Water-saving Irrigation Experimental Station of Xinjiang Academy of Agricultural and Reclamation Sciences                                                |
| Li Zhijun     | Effects of water-fertilizer coupling on field cotton growth and yield under fertigation in Xinjiang                                                          | Field Observation and Experimental Station of Crop Efficient Water Use of the Ministry of Agriculture of Shihezi, Xinjiang                               |
| Deng Zhong    | Effects of water and nitrogen regulation on root and shoot growth characteristics and yield of cotton in arid area                                           | Key Irrigation Experimental Station of Water Conservancy Management Office of Bayingolin Mongolian                                                       |

|               |                                                                                                                                    |                                                                                                                                                                              |
|---------------|------------------------------------------------------------------------------------------------------------------------------------|------------------------------------------------------------------------------------------------------------------------------------------------------------------------------|
| Zhong Zhibo   | Effects of different water and nitrogen fertilizers application on growth characteristics and yield of cotton in northern Xinjiang | Autonomous Prefecture, Xinjiang Shihezi Scientific Observation and Experimental Station of Crop Efficient Water Use of the Ministry of Agriculture                           |
| Zhang Yan     | Coupling water and fertilizer effects on cotton yield, nitrogen accumulation and nitrogen use efficiency                           | Water-saving irrigation experiment of Xinjiang Academy of Agricultural and Reclamation Sciences stand                                                                        |
| Liao Huan     | Optimal water scheme and N rate for high N uptake and yield of machine-harvested cotton                                            | Shihezi University Agricultural Science Comprehensive Teaching Experimental Center                                                                                           |
| Yang Shoule   | Effects of water and nitrogen coupling on cotton growth characteristics and yield in arid area                                     | Key Irrigation Experimental Station of Water Conservancy Management Office of Bayingolin Mongolian Autonomous Prefecture, Xinjiang                                           |
| Lin Tao       | The effect of deficit irrigation on the yield and water utilization of machine-picked cotton under condition of drip irrigation    | Desert Oasis Cultivation and Cultivation Field Comprehensive Observation and Experimental Station of the Ministry of Agriculture and Rural Affairs of Awati County, Xinjiang |
| Shi Hongliang | Research on the compensation effect of nitrogen fertilizer on cotton yield formation under non-sufficient drip irrigation          | Xinjiang Aksu Awati County Harvest 2 Harvest 1 Lian Xinjiang Academy of Agricultural Sciences Economic Workshop                                                              |
| Li Yuyi       | Effect of drip irrigation under plastic mulch on aeolian sandy soil salt dynamic and cotton yield                                  | Experimental base of soil improvement station in Shihezi Fort Town, Xinjiang                                                                                                 |
| Xue Fengding  | Effects of water-fertilizer coupling on field cotton under fertigation                                                             | Shihezi City, Xinjiang Academy of Agricultural Reclamation Sciences Test Site                                                                                                |
| Wang Haidong  | Water-fertilizer coupling effects of field cotton in Xinjiang under fertigation                                                    | Shihezi City, Xinjiang Academy of Agricultural Reclamation Sciences Test Site                                                                                                |
| Zhong Zhibo   | Research on irrigation and fertilization system and fertilization strategy of cotton under film                                    | Shihezi Scientific Observation and Experimental Station of Crop Efficient Water Use of the Ministry of Agriculture                                                           |
| Wu Lifeng     | Coupling effect of water and fertilizer under fertigation and simulation growth of cotton in Xinjiang                              | Xinjiang Agricultural Star Academy of Sciences Water-saving Irrigation Experimental Station                                                                                  |
| Li Xinxin     | Water–nitrogen coupling and multi-objective optimization of cotton under mulched drip irrigation in arid northwest China           | Shihezi Irrigation District, Xinjiang                                                                                                                                        |

|                |                                                                                                                                                          |                                                                                                                    |
|----------------|----------------------------------------------------------------------------------------------------------------------------------------------------------|--------------------------------------------------------------------------------------------------------------------|
| Huang Jian     | Different sowing dates affected cotton yield and yield components                                                                                        | Shihezi City of the Xinjiang UygurAutonomous Region                                                                |
| Zheng Yaokai   | Experimental research on effect of irrigation scheduling on moisture and salt change of mulched drip irrigation for cotton                               | The 125th Regiment of the Seventh Agricultural Division of the Xinjiang Corps                                      |
| Huang Zhenzhen | Effect of layout of drip irrigation belt and irrigation quota on soil properties and cotton yield                                                        | Cotton Breeding Experimental Base of Xinjiang Agricultural University, Shawan County, Tacheng Prefecture, Xinjiang |
| Hou Xianghao   | Spatial distribution and variability of soil salinity in film-mulched cotton fields under various drip irrigation regimes in southern Xinjiang of China  | located in Korla, Xinjiang, China                                                                                  |
| Zhang Dongmei  | Effects of deficit irrigation and plant density on the growth, yield and fiber quality of irrigated cotton                                               | Southern Tumushuke city, Xinjiang, China,                                                                          |
| Yang Chuanjie  | Effect of deficit irrigation on the growth, water use characteristics and yield of cotton in arid northwest China                                        | Experimental Irrigation Station of Shi-hezi University in Xinjiang, China,                                         |
| Wang Haidong   | Coupling effects of water and fertilizer on yield, water and fertilizer use efficiency of drip-fertigated cotton in northern Xinjiang, China             | Test Station of the Xinjiang Academy of Agricultural Reclamation Sciences in Shihezi, Xinjiang Province, China.    |
| He Pingru      | Effects of soil water regulation on the cotton yield, fiber quality and soil salt accumulation under mulched drip irrigation in southern Xinjiang, China | Korla city, Xinjiang                                                                                               |
| Hou Xianghao   | Optimal irrigation amount and nitrogen rate improved seed cotton yield while maintaining fiber quality of drip-fertigated cotton in northwest China      | Experimental station located in Korla, Xinjiang, China                                                             |
| Li Gan         | Membrane under drip irrigation water regulation on machine-harvested cotton photosynthetic characteristic and yield formation mechanism research         | The third team of Chuangtian in Liuhudi Town, Manas County, Changji Prefecture, Xinjiang                           |
