# Supplementary material for: Evaluating the Effect of Deficit Irrigation on Yield and Water Use Efficiency of Drip Irrigation Cotton under Film in Xinjiang Based on Meta-Analysis
Source: Plants (Basel). 2024 Feb 26;13(5):640. doi: 10.3390/plants13050640 (PMC10935209; doi:10.3390/plants13050640)
Supplement: Supplementary file 1 [file plants-13-00640-s001.zip › supplementary material.xlsx]

## Sheet: Yield
Data included in the meta-analysis
Number	Reference	Experimental station	Latitude	Longitude	Climatic conditions			Soil conditions			Management measures						NC	NE	MC	ME	SDc	SDe	Yield(LnR)
					Annual temperature(°C)	Annual evaporation(mm)	Annual precipitation(mm)	Soil texture	Initial soil organic carbon(g/kg)	Initial soil available nitrogen(mg/kg)	Irrigation amount(m3/ha)	Irrigation frequency	Nitrogen application(kg/ha)	Drip tape mode	Variety	Planting density(10,000 plants /ha)
1	Shen, X.J.et al.	The test base of the Irrigation Test Center Station of the Xinjiang Production and Construction Corps	43°59′N	87°23′E	NA	1600	190	Loam	NA	NA	3031	7	207	One film, one tube, four rows	Xinluzao 9	NA	3	3	5536.57	4899.07	553.657	489.907	-0.1223
			43°59′N	87°23′E	NA	1600	190	Loam	NA	NA	2251	7	207	One film, one tube, four rows	Xinluzao 9	NA	3	3	5536.57	2853.3	553.657	285.33	-0.6629
			43°59′N	87°23′E	NA	1600	190	Loam	NA	NA	3156	7	207	One film, one tube, four rows	Xinluzao 9	NA	3	3	5536.57	5630.19	553.657	563.019	0.0168
2	He, P.R.et al.	Yuli County, Korla City, Xinjiang	40°53′N	86°56′E	11	2417	58	Sandy soil	NA	NA	3342	12	300	One film, two tubes, four rows	Xinluzhong 66	NA	3	3	7233.2	7146.4	723.32	714.64	-0.0121
			40°53′N	86°56′E	11	2417	58	Sandy soil	NA	NA	2531	7	300	One film, two tubes, four rows	Xinluzhong 66	NA	3	3	7233.2	6577.6	723.32	657.76	-0.095
			40°53′N	86°56′E	11	2417	58	Sandy soil	NA	NA	2271	5	300	One film, two tubes, four rows	Xinluzhong 66	NA	3	3	7233.2	6127.4	723.32	612.74	-0.1659
			40°53′N	86°56′E	11	2417	58	Sandy soil	NA	NA	2011	4	300	One film, two tubes, four rows	Xinluzhong 66	NA	3	3	7233.2	5988.7	723.32	598.87	-0.1888
3	Wang, C.et al.	Water-saving Irrigation Experimental Base of School of Water Conservancy and Architectural Engineering, Tarim University, Xinjiang	40°37′N	80°51′E	10	2110.5	67.2	Sandy loam	NA	NA	2841	13	198	One film, two tubes, four rows	Xinluzhong 28	NA	3	3	5025	3700	502.5	370	-0.3061
			40°37′N	80°51′E	10	2110.5	67.2	Sandy loam	NA	NA	3392	13	198	One film, two tubes, four rows	Xinluzhong 28	NA	3	3	5025	4580	502.5	458	-0.0927
4	Yi, P.F.et al.	Key Experimental Station of Agricultural Water-saving Irrigation in Arid Area of Shihezi University	45°19′N	86°03′E	6.85	1250	166.35	Medium loam	NA	63	3300	16	207	One film, two tubes, four rows	Xinluzao 710	NA	3	3	6333.06	5146.05	633.306	514.605	-0.2076
			45°19′N	86°03′E	6.85	1250	166.35	Medium loam	NA	63	3300	13	207	One film, two tubes, four rows	Xinluzao 710	NA	3	3	6702.57	4619.14	670.257	461.914	-0.3723
			45°19′N	86°03′E	6.85	1250	166.35	Medium loam	NA	63	3300	10	207	One film, two tubes, four rows	Xinluzao 710	NA	3	3	5416.85	4391.81	541.685	439.181	-0.2098
5	Pan, J.J.et al.	Modern irrigation demonstration site in Dafeng Town, Hutubi County, Changji Prefecture	44°10′N	86°37′E	5.5	NA	167	Sandy loam	5.5448	35.42	3527	NA	NA	one film, three tubes, six rows	Xinluzao 57	NA	3	3	5216.85	4843.35	521.685	484.335	-0.0743
			44°10′N	86°37′E	5.5	NA	167	Sandy loam	5.5448	35.42	3001	NA	NA	one film, three tubes, six rows	Xinluzao 57	NA	3	3	5216.85	4789.95	521.685	478.995	-0.0854
			44°10′N	86°37′E	5.5	NA	167	Sandy loam	5.5448	35.42	3159	NA	NA	one film, three tubes, six rows	Xinluzao 57	NA	3	3	5216.85	5029.95	521.685	502.995	-0.0365
			44°10′N	86°37′E	5.5	NA	167	Sandy loam	5.5448	35.42	3392	NA	NA	one film, three tubes, six rows	Xinluzao 57	NA	3	3	5216.85	5197.35	521.685	519.735	-0.0037
6	Wang, X.Y.et al.	Shihezi University Experimental Station	45°11′N	86°31′E	NA	NA	NA	Medium loam	7.25	54.9	3360	8	NA	NA	Xinluzao 45	20.8	4	4	6089	5694	608.9	569.4	-0.0671
			45°11′N	86°31′E	NA	NA	NA	Medium loam	7.25	54.9	2880	8	NA	NA	Xinluzao 45	20.8	4	4	6089	5013	608.9	501.3	-0.1944
			45°11′N	86°31′E	NA	NA	NA	Medium loam	7.25	54.9	3360	8	NA	NA	Xinluzao 45	20.8	4	4	5874	5689	587.4	568.9	-0.032
			45°11′N	86°31′E	NA	NA	NA	Medium loam	7.25	54.9	2880	8	NA	NA	Xinluzao 45	20.8	4	4	5874	5184	587.4	518.4	-0.125
7	Dou, Q.Q.et al.	Qubian Village, Shawan County, Xinjiang	44°69′N	85°70′E	NA	1500	NA	Clay loam soil	6.496	66.43	3350	8	NA	one film, three tubes, six rows	Xinluzao 50	26	3	3	4723	4355.88	472.3	435.588	-0.0809
			44°69′N	85°70′E	NA	1500	NA	Clay loam soil	6.496	66.43	2950	8	NA	one film, three tubes, six rows	Xinluzao 50	26	3	3	4723	3695.85	472.3	369.585	-0.2452
			44°69′N	85°70′E	NA	1500	NA	Clay loam soil	6.496	66.43	3350	8	NA	one film, three tubes, six rows	Xinluzao 73	26	3	3	5718.93	5360.55	571.893	536.055	-0.0647
			44°69′N	85°70′E	NA	1500	NA	Clay loam soil	6.496	66.43	2950	8	NA	one film, three tubes, six rows	Xinluzao 73	26	3	3	5718.93	4616.06	571.893	461.606	-0.2142
8	Han, X.F.et al.	Experimental Station of the School of Water Conservancy and Architecture, Tarim University	40°32′N	81°17′E	NA	NA	NA	Sandy loam	NA	NA	3000	NA	375	One film, one tube, two rows	Zhaofeng No.1	18	3	3	7714.3	8289.5	771.43	828.95	0.0719
			40°32′N	81°17′E	NA	NA	NA	Sandy loam	NA	NA	1875	NA	375	One film, one tube, two rows	Zhaofeng No.1	18	3	3	7714.3	5756	771.43	575.6	-0.2928
			40°32′N	81°17′E	NA	NA	NA	Sandy loam	NA	NA	750	NA	375	One film, one tube, two rows	Zhaofeng No.1	18	3	3	7714.3	2716.4	771.43	271.64	-1.0438
9	Wu, F.Q.et al.	Awati County, Aksu City, Xinjiang Uygur Autonomous Region	40°10′N	80°50′E	NA	NA	NA	NA	4.002	NA	2250	12	NA	NA	Xinluzhong 47	NA	6	6	7338.28	4875.68	733.828	487.568	-0.4088
			40°10′N	80°50′E	NA	NA	NA	NA	4.002	NA	2850	13	NA	NA	Xinluzhong 47	NA	6	6	7338.28	5355.86	733.828	535.586	-0.3149
			40°10′N	80°50′E	NA	NA	NA	NA	4.002	NA	3450	13	NA	NA	Xinluzhong 47	NA	6	6	7338.28	6277.67	733.828	627.767	-0.1561
10	Li, N.N.et al.	Agronomy Experimental Station of Shihezi University	45°19′N	86°03′E	NA	NA	NA	Medium loam	7.25	54.9	3360	NA	NA	NA	Xinluzao 45	20.8	4	4	5936.17	5744.68	297.87	297.87	-0.0328
			45°19′N	86°03′E	NA	NA	NA	Medium loam	7.25	54.9	2800	NA	NA	NA	Xinluzao 45	20.8	4	4	5936.17	5234.04	297.87	63.83	-0.1259
11	Cui, J.P.et al.	Awati County, Xinjiang	40°10′N	80°25′E	NA	NA	NA	NA	4.002	59.2	2250	NA	381	NA	NA	NA	3	3	5655	2775	565.5	277.5	-0.7119
			40°10′N	80°25′E	NA	NA	NA	NA	4.002	59.2	2700	NA	381	NA	NA	NA	3	3	5655	3945	565.5	394.5	-0.3601
			40°10′N	80°25′E	NA	NA	NA	NA	4.002	59.2	3150	NA	381	NA	NA	NA	3	3	5655	4710	565.5	471	-0.1829
			40°10′N	80°25′E	NA	NA	NA	NA	4.002	59.2	3400	NA	381	NA	NA	NA	3	3	5655	5880	565.5	588	0.039
12	Wang, J.C.et al.	Experimental Station of the Institute of Water Construction, Tarim University	40°22′N	80°30′E	NA	NA	NA	NA	NA	NA	3000	9	NA	One film, one tube, two rows	Zhaofeng No.1	18.99	3	3	6409	6422	640.9	642.2	0.002
			40°22′N	80°30′E	NA	NA	NA	NA	NA	NA	1875	9	NA	One film, one tube, two rows	Zhaofeng No.1	18.99	3	3	6409	5352	640.9	535.2	-0.1802
			40°22′N	80°30′E	NA	NA	NA	NA	NA	NA	750	9	NA	One film, one tube, two rows	Zhaofeng No.1	18.99	3	3	6409	2268	640.9	226.8	-1.0388
13	Wang, J.C.et al.	Experimental Station of the Institute of Water Construction, Tarim University	40°22′N	80°30′E	11.2	1988.4	45.7	Sandy loam	NA	54.2	3000	9	555	One film, one tube, two rows	Zhaofeng No.1	18	3	3	7714.3	8289.5	771.43	828.95	0.0719
			40°22′N	80°30′E	11.2	1988.4	45.7	Sandy loam	NA	54.2	1875	9	555	One film, one tube, two rows	Zhaofeng No.1	18	3	3	7714.3	5756	771.43	575.6	-0.2928
			40°22′N	80°30′E	11.2	1988.4	45.7	Sandy loam	NA	54.2	750	9	555	One film, one tube, two rows	Zhaofeng No.1	18	3	3	7714.3	2716.4	771.43	271.64	-1.0438
14	Gao, S.et al.	NA	NA	NA	NA	NA	NA	Sandy loam	NA	NA	3000	9	375	One film, one tube, two rows	Zhaofeng No.1	18	3	3	7714.3	8289.5	771.43	828.95	0.0719
		NA	NA	NA	NA	NA	NA	Sandy loam	NA	NA	1875	9	375	One film, one tube, two rows	Zhaofeng No.1	18	3	3	7714.3	5956	771.43	595.6	-0.2587
		NA	NA	NA	NA	NA	NA	Sandy loam	NA	NA	750	9	375	One film, one tube, two rows	Zhaofeng No.1	18	3	3	7714.3	2716.4	771.43	271.64	-1.0438
15	Li ， F.S.et al.	Hongliutang Village, Dafeng Town, Hutubi County, Xinjiang	44°11′N	86°36′E	6.7	2361.1	161	NA	NA	NA	1950	9	NA	One film, two tubes, six rows	Xinluzao 45	NA	3	3	5458	5074	545.8	507.4	-0.073
			44°11′N	86°36′E	6.7	2361.1	161	NA	NA	NA	1950	9	NA	One film, two tubes, six rows	Xinluzao 45	NA	3	3	6202	5170	620.2	517	-0.182
			44°11′N	86°36′E	6.7	2361.1	161	NA	NA	NA	1950	9	NA	One film, two tubes, six rows	Xinluzao 45	NA	3	3	6338	5001	633.8	500.1	-0.2369
			44°11′N	86°36′E	6.7	2361.1	161	NA	NA	NA	2610	9	NA	One film, two tubes, six rows	Xinluzao 45	NA	3	3	5458	5410	545.8	541	-0.0088
			44°11′N	86°36′E	6.7	2361.1	161	NA	NA	NA	2610	9	NA	One film, two tubes, six rows	Xinluzao 45	NA	3	3	6202	5720	620.2	572	-0.0809
			44°11′N	86°36′E	6.7	2361.1	161	NA	NA	NA	2610	9	NA	One film, two tubes, six rows	Xinluzao 45	NA	3	3	6338	5242	633.8	524.2	-0.1899
			44°11′N	86°36′E	6.7	2361.1	161	NA	NA	NA	3255	9	NA	One film, two tubes, six rows	Xinluzao 45	NA	3	3	5458	5672	545.8	567.2	0.0385
			44°11′N	86°36′E	6.7	2361.1	161	NA	NA	NA	3255	9	NA	One film, two tubes, six rows	Xinluzao 45	NA	3	3	6202	5769	620.2	576.9	-0.0724
			44°11′N	86°36′E	6.7	2361.1	161	NA	NA	NA	3255	9	NA	One film, two tubes, six rows	Xinluzao 45	NA	3	3	6338	5864	633.8	586.4	-0.0777
16	Wang, L.et al.	Experimental base of Xinjiang Awati County Academy of Agricultural Sciences	40°06′N	80°44′E	10.4	1890.7	46.7	Sandy loam	NA	NA	2400	10	310.5	One film, two tubes, six rows	NA	24	4	4	5208.5	5247.9	520.85	524.79	0.0075
			40°06′N	80°44′E	10.4	1890.7	46.7	Sandy loam	NA	NA	3000	10	310.5	One film, two tubes, six rows	NA	24	4	4	5208.5	5821.7	520.85	582.17	0.1113
			40°06′N	80°44′E	10.4	1890.7	46.7	Sandy loam	NA	NA	3600	10	310.5	One film, two tubes, six rows	NA	24	4	4	5208.5	5787.7	520.85	578.77	0.1054
17	Dou, Q.Q.	Qubian Village, Sidaohezi Town, Shawan County, Xinjiang	44°29′N	85°57′E	NA	1750	246	Clay loam soil	6.496	66.43	3350	8	NA	NA	Xinluzao 50	21.93	3	3	4723	4355.88	472.3	435.588	-0.0809
			44°29′N	85°57′E	NA	1750	246	Clay loam soil	6.496	66.43	2950	8	NA	NA	Xinluzao 50	21.93	3	3	4723	3695.85	472.3	369.585	-0.2452
			44°29′N	85°57′E	NA	1750	246	Clay loam soil	6.496	66.43	3350	8	NA	NA	Xinluzao 73	21.93	3	3	5718.93	5360.55	571.893	536.055	-0.0647
			44°29′N	85°57′E	NA	1750	246	Clay loam soil	6.496	66.43	2950	8	NA	NA	Xinluzao 73	21.93	3	3	5718.93	4616.06	571.893	461.606	-0.2142
18	Fan, K.	Soil and Water Conservation Experimental Station of the Water Conservancy Bureau of the First Division of the Xinjiang Production and Construction Corps	40°6′N	81°2′E	11.3	2217.75	45.7	NA	NA	NA	2641	11	NA	One film, two tubes, six rows	Xinluzhong 46	NA	3	3	7072.05	5945.25	707.205	594.525	-0.1736
			40°6′N	81°2′E	11.3	2217.75	45.7	NA	NA	NA	3302	11	NA	One film, two tubes, six rows	Xinluzhong 46	NA	3	3	7072.05	6626.7	707.205	662.67	-0.065
			40°6′N	81°2′E	11.3	2217.75	45.7	NA	NA	NA	2641	11	NA	One film, two tubes, six rows	Xinluzhong 46	NA	3	3	6072.05	5315.37	607.205	531.537	-0.1331
			40°6′N	81°2′E	11.3	2217.75	45.7	NA	NA	NA	3302	11	NA	One film, two tubes, six rows	Xinluzhong 46	NA	3	3	6072.05	5783.57	607.205	578.357	-0.0487
19	Zhao, Y.M.	Shihezi Institute of Arid Agriculture	44°26′	86°01′	6.6	1514.9	175.5	Sandy soil	NA	75	2730	14	NA	NA	NA	22.3	3	3	5722	4338	572.2	433.8	-0.2769
			44°26′	86°01′	6.6	1514.9	175.5	Sandy soil	NA	75	3360	14	NA	NA	NA	22.3	3	3	5722	5134	572.2	513.4	-0.1084
20	Li, N.	Irrigation Experimental Station of the Water Conservancy Bureau of the First Division of the Xinjiang Production and Construction Corps	40°6′N	81°2′E	NA	NA	NA	NA	NA	NA	3012	10	226.5	One film, two tubes, four rows	NA	21.1	3	3	6350.69	5537.48	635.069	553.748	-0.137
			40°6′N	81°2′E	NA	NA	NA	NA	NA	NA	3012	13	226.5	One film, two tubes, four rows	NA	21.1	3	3	6471.39	5615.3	647.139	561.53	-0.1419
21	Yang, Y.	Agronomy Experimental Station of Shihezi University	45°32′N	86°05′E	NA	NA	NA	NA	NA	NA	2972	NA	NA	NA	Xinluzao45	NA	3	3	8505	5800	467	386	-0.3828
			45°32′N	86°05′E	NA	NA	NA	NA	NA	NA	3570	NA	NA	NA	Xinluzao45	NA	3	3	8505	5762	467	436	-0.3894
			45°32′N	86°05′E	NA	NA	NA	NA	NA	NA	1530	NA	NA	NA	Xinluzao45	NA	3	3	8505	4358	467	322	-0.6686
22	He, P.R.	Yuli County, Korla City, Xinjiang	40°53′N	86°56′E	11	2417	58	Sandy soil	NA	NA	3342	12	300	One film, two tubes, four rows	Xinluzhong 66	NA	3	3	7233.2	7146.5	723.32	714.65	-0.0121
			40°53′N	86°56′E	11	2417	58	Sandy soil	NA	NA	2531	7	300	One film, two tubes, four rows	Xinluzhong 66	NA	3	3	7233.2	6577.6	723.32	657.76	-0.095
			40°53′N	86°56′E	11	2417	58	Sandy soil	NA	NA	2271	5	300	One film, two tubes, four rows	Xinluzhong 66	NA	3	3	7233.2	6127.4	723.32	612.74	-0.1659
			40°53′N	86°56′E	11	2417	58	Sandy soil	NA	NA	2011	4	300	One film, two tubes, four rows	Xinluzhong 66	NA	3	3	7233.2	5988.7	723.32	598.87	-0.1888
23	Wang, F.et al.	Aksu National Field Scientific Observation and Research Station of Farmland Ecosystem, Chinese Academy of Sciences	40°37′N	80°51′E	11.3	NA	45.7	Sandy soil	NA	NA	2949	NA	194	One film, two tubes, six rows	NA	NA	3	3	8652.4	9178.3	599.2	566.7	0.059
			40°37′N	80°51′E	11.3	NA	45.7	Sandy soil	NA	NA	2041	NA	194	One film, two tubes, six rows	NA	NA	3	3	8652.4	8886.4	599.2	375.7	0.0267
			40°37′N	80°51′E	11.3	NA	45.7	Sandy soil	NA	NA	2993	NA	194	One film, two tubes, six rows	NA	NA	3	3	8602	9128.4	35.7	361.1	0.0594
			40°37′N	80°51′E	11.3	NA	45.7	Sandy soil	NA	NA	2070	NA	194	One film, two tubes, six rows	NA	NA	3	3	8602	8749.9	35.7	214.7	0.017
24	Xing， X.N.et al.	Hydraulic and Architectural Engineering, Tarim University The test base of the hospital	40°20′N	79°23′E	10.8	2267.7	61.3	Sandy loam	NA	NA	3602	12	NA	One film, two tubes, four rows	Xinluzhong 28	NA	3	3	6901.2	6267.6	690.12	626.76	-0.0963
			40°20′N	79°23′E	10.8	2267.7	61.3	Sandy loam	NA	NA	3602	16	NA	One film, two tubes, four rows	Xinluzhong 28	NA	3	3	7308.5	6666.3	730.85	666.63	-0.092
25	Wu, L.F.et al.	Water-saving Irrigation Experimental Station of Xinjiang Academy of Agricultural and Reclamation Sciences	44°18′N	85°58′E	NA	NA	121	Sandy soil	10.44	79.76	2911	9	150	one film, three tubes, six rows	Xinluzao 33	NA	3	3	5149	3983	514.9	398.3	-0.2568
			44°18′N	85°58′E	NA	NA	121	Sandy soil	10.44	79.76	2911	9	200	one film, three tubes, six rows	Xinluzao 33	NA	3	3	5302	4055	530.2	405.5	-0.2681
			44°18′N	85°58′E	NA	NA	121	Sandy soil	10.44	79.76	2911	9	250	one film, three tubes, six rows	Xinluzao 33	NA	3	3	5635	4472	563.5	447.2	-0.2312
			44°18′N	85°58′E	NA	NA	121	Sandy soil	10.44	79.76	2911	9	300	one film, three tubes, six rows	Xinluzao 33	NA	3	3	5705	4397	570.5	439.7	-0.2604
			44°18′N	85°58′E	NA	NA	121	Sandy soil	10.44	79.76	2911	9	350	one film, three tubes, six rows	Xinluzao 33	NA	3	3	5616	4489	561.6	448.9	-0.224
			44°18′N	85°58′E	NA	NA	121	Sandy soil	10.44	79.76	2671	9	150	one film, three tubes, six rows	Xinluzao 33	NA	3	3	5514	4297	551.4	429.7	-0.2494
			44°18′N	85°58′E	NA	NA	121	Sandy soil	10.44	79.76	2671	9	200	one film, three tubes, six rows	Xinluzao 33	NA	3	3	5685	4502	568.5	450.2	-0.2333
			44°18′N	85°58′E	NA	NA	121	Sandy soil	10.44	79.76	2671	9	250	one film, three tubes, six rows	Xinluzao 33	NA	3	3	5888	4610	588.8	461	-0.2447
			44°18′N	85°58′E	NA	NA	121	Sandy soil	10.44	79.76	2671	9	300	one film, three tubes, six rows	Xinluzao 33	NA	3	3	5811	4451	581.1	445.1	-0.2666
			44°18′N	85°58′E	NA	NA	121	Sandy soil	10.44	79.76	2671	9	350	one film, three tubes, six rows	Xinluzao 33	NA	3	3	5745	4415	574.5	441.5	-0.2633
			44°18′N	85°58′E	NA	NA	121	Sandy soil	10.44	79.76	3292	9	150	one film, three tubes, six rows	Xinluzao 33	NA	3	3	5514	4851	551.4	485.1	-0.1281
			44°18′N	85°58′E	NA	NA	121	Sandy soil	10.44	79.76	3292	9	200	one film, three tubes, six rows	Xinluzao 33	NA	3	3	5685	5424	568.5	542.4	-0.047
			44°18′N	85°58′E	NA	NA	121	Sandy soil	10.44	79.76	3292	9	250	one film, three tubes, six rows	Xinluzao 33	NA	3	3	5888	5574	588.8	557.4	-0.0548
			44°18′N	85°58′E	NA	NA	121	Sandy soil	10.44	79.76	3292	9	300	one film, three tubes, six rows	Xinluzao 33	NA	3	3	5811	5569	581.1	556.9	-0.0425
			44°18′N	85°58′E	NA	NA	121	Sandy soil	10.44	79.76	3292	9	350	one film, three tubes, six rows	Xinluzao 33	NA	3	3	5745	5499	574.5	549.9	-0.0438
26	Wu, L.F.et al.	Water-saving Irrigation Experimental Station of Xinjiang Academy of Agricultural and Reclamation Sciences	44°30′N	86°07′E	NA	NA	121	Sandy soil	NA	NA	2911	NA	150	one film, three tubes, six rows	Xinluzao 33	NA	3	3	5139.86	3989.51	513.986	398.951	-0.2534
			44°30′N	86°07′E	NA	NA	121	Sandy soil	NA	NA	2911	NA	200	one film, three tubes, six rows	Xinluzao 33	NA	3	3	5311.19	4062.94	531.119	406.294	-0.2679
			44°30′N	86°07′E	NA	NA	121	Sandy soil	NA	NA	2911	NA	250	one film, three tubes, six rows	Xinluzao 33	NA	3	3	5629.37	4454.55	562.937	445.455	-0.2341
			44°30′N	86°07′E	NA	NA	121	Sandy soil	NA	NA	2911	NA	300	one film, three tubes, six rows	Xinluzao 33	NA	3	3	5702.8	4405.59	570.28	440.559	-0.2581
			44°30′N	86°07′E	NA	NA	121	Sandy soil	NA	NA	2911	NA	350	one film, three tubes, six rows	Xinluzao 33	NA	3	3	5629.37	4503.5	562.937	450.35	-0.2231
			44°30′N	86°07′E	NA	NA	121	Sandy soil	NA	NA	2671	NA	150	one film, three tubes, six rows	Xinluzao 33	NA	3	3	5139.86	4292.68	513.986	429.268	-0.1801
			44°30′N	86°07′E	NA	NA	121	Sandy soil	NA	NA	2671	NA	200	one film, three tubes, six rows	Xinluzao 33	NA	3	3	5311.19	4487.8	531.119	448.78	-0.1685
			44°30′N	86°07′E	NA	NA	121	Sandy soil	NA	NA	2671	NA	250	one film, three tubes, six rows	Xinluzao 33	NA	3	3	5629.37	4609.76	562.937	460.976	-0.1998
			44°30′N	86°07′E	NA	NA	121	Sandy soil	NA	NA	2671	NA	300	one film, three tubes, six rows	Xinluzao 33	NA	3	3	5702.8	4439.02	570.28	443.902	-0.2505
			44°30′N	86°07′E	NA	NA	121	Sandy soil	NA	NA	2671	NA	350	one film, three tubes, six rows	Xinluzao 33	NA	3	3	5629.37	4414.63	562.937	441.463	-0.2431
			44°30′N	86°07′E	NA	NA	121	Sandy soil	NA	NA	3292	NA	150	one film, three tubes, six rows	Xinluzao 33	NA	3	3	5512.2	4829.27	551.22	482.927	-0.1323
			44°30′N	86°07′E	NA	NA	121	Sandy soil	NA	NA	3292	NA	200	one film, three tubes, six rows	Xinluzao 33	NA	3	3	5682.93	5414.63	568.293	541.463	-0.0484
			44°30′N	86°07′E	NA	NA	121	Sandy soil	NA	NA	3292	NA	250	one film, three tubes, six rows	Xinluzao 33	NA	3	3	5878.05	5560.98	587.805	556.098	-0.0555
			44°30′N	86°07′E	NA	NA	121	Sandy soil	NA	NA	3292	NA	300	one film, three tubes, six rows	Xinluzao 33	NA	3	3	5804.88	5560.98	580.488	556.098	-0.0429
			44°30′N	86°07′E	NA	NA	121	Sandy soil	NA	NA	3292	NA	350	one film, three tubes, six rows	Xinluzao 33	NA	3	3	5731.71	5487.8	573.171	548.78	-0.0435
27	Li, Z.J.et al.	Field Observation and Experimental Station of Crop Efficient Water Use of the Ministry of Agriculture of Shihezi, Xinjiang	44°20′N	85°20′E	NA	NA	121	Sandy soil	10.44	79.76	2611	NA	150	one film, three tubes, six rows	Xinken 1	NA	3	3	5032.99	4112.28	503.299	411.228	-0.202
			44°20′N	85°20′E	NA	NA	121	Sandy soil	10.44	79.76	2611	NA	200	one film, three tubes, six rows	Xinken 1	NA	3	3	5107.61	4289.06	510.761	428.906	-0.1747
			44°20′N	85°20′E	NA	NA	121	Sandy soil	10.44	79.76	2611	NA	250	one film, three tubes, six rows	Xinken 1	NA	3	3	6690.64	4730.47	669.064	473.047	-0.3467
			44°20′N	85°20′E	NA	NA	121	Sandy soil	10.44	79.76	2611	NA	300	one film, three tubes, six rows	Xinken 1	NA	3	3	7075.01	5701.81	707.501	570.181	-0.2158
			44°20′N	85°20′E	NA	NA	121	Sandy soil	10.44	79.76	2611	NA	350	one film, three tubes, six rows	Xinken 1	NA	3	3	5964.19	5346.68	596.419	534.668	-0.1093
			44°20′N	85°20′E	NA	NA	121	Sandy soil	10.44	79.76	3282	NA	150	one film, three tubes, six rows	Xinken 1	NA	3	3	5032.99	4506.08	503.299	450.608	-0.1106
			44°20′N	85°20′E	NA	NA	121	Sandy soil	10.44	79.76	3282	NA	200	one film, three tubes, six rows	Xinken 1	NA	3	3	5107.61	4774.34	510.761	477.434	-0.0675
			44°20′N	85°20′E	NA	NA	121	Sandy soil	10.44	79.76	3282	NA	250	one film, three tubes, six rows	Xinken 1	NA	3	3	6690.64	5769.66	669.064	576.966	-0.1481
			44°20′N	85°20′E	NA	NA	121	Sandy soil	10.44	79.76	3282	NA	300	one film, three tubes, six rows	Xinken 1	NA	3	3	7075.01	6576.78	707.501	657.678	-0.073
			44°20′N	85°20′E	NA	NA	121	Sandy soil	10.44	79.76	3282	NA	350	one film, three tubes, six rows	Xinken 1	NA	3	3	5964.19	6181.33	596.419	618.133	0.0358
28	Deng, Z.et al.	Key Irrigation Experimental Station of Water Conservancy Management Office of Bayingolin Mongolian Autonomous Prefecture, Xinjiang	41°72′N	86°17′E	NA	2250	50	Sandy soil	7.25	58.7	3300	NA	150	NA	Xinluzhong 26	NA	3	3	5970	5136	597	513.6	-0.1505
			41°72′N	86°17′E	NA	2250	50	Sandy soil	7.25	58.7	3300	NA	225	NA	Xinluzhong 26	NA	3	3	6435.77	5867.95	643.577	586.795	-0.0924
			41°72′N	86°17′E	NA	2250	50	Sandy soil	7.25	58.7	3300	NA	300	NA	Xinluzhong 26	NA	3	3	6992.33	6453.3	699.233	645.33	-0.0802
			41°72′N	86°17′E	NA	2250	50	Sandy soil	7.25	58.7	3300	NA	375	NA	Xinluzhong 26	NA	3	3	6724.5	6382.05	672.45	638.205	-0.0523
29	Zhong, Z.B.et al.	Shihezi Scientific Observation and Experimental Station of Crop Efficient Water Use of the Ministry of Agriculture	45°38′N	86°09′E	8.6	1742	204	NA	4.1412	34.3	3000	9	300	one film, three tubes, six rows	Xinluzao 60	NA	3	3	6256.5	4891.5	625.65	489.15	-0.2461
			45°38′N	86°09′E	8.6	1742	204	NA	4.1412	34.3	3000	9	262.5	one film, three tubes, six rows	Xinluzao 60	NA	3	3	6460.5	5226	646.05	522.6	-0.2121
			45°38′N	86°09′E	8.6	1742	204	NA	4.1412	34.3	3000	9	225	one film, three tubes, six rows	Xinluzao 60	NA	3	3	5593.5	4615.5	559.35	461.55	-0.1922
30	Zhang, Y.et al.	Water-saving irrigation experiment of Xinjiang Academy of Agricultural and Reclamation Sciences stand	43°57′N	87°29′E	NA	2000	166	Sandy soil	10.44	79.76	2911	9	350	One film, two tubes, four rows	Xinluzao 33	NA	3	3	5149	3983	514.9	398.3	-0.2568
			43°57′N	87°29′E	NA	2000	166	Sandy soil	10.44	79.76	2911	9	300	One film, two tubes, four rows	Xinluzao 33	NA	3	3	5302	4055	530.2	405.5	-0.2681
			43°57′N	87°29′E	NA	2000	166	Sandy soil	10.44	79.76	2911	9	250	One film, two tubes, four rows	Xinluzao 33	NA	3	3	5635	4472	563.5	447.2	-0.2312
			43°57′N	87°29′E	NA	2000	166	Sandy soil	10.44	79.76	2911	9	200	One film, two tubes, four rows	Xinluzao 33	NA	3	3	5705	4397	570.5	439.7	-0.2604
			43°57′N	87°29′E	NA	2000	166	Sandy soil	10.44	79.76	2911	9	150	One film, two tubes, four rows	Xinluzao 33	NA	3	3	5616	4489	561.6	448.9	-0.224
31	Liao, H.et al.	Shihezi University Agricultural Science Comprehensive Teaching Experimental Center	44°33′N	85°98′E	NA	1950	200	Loam	NA	NA	2478	8	0	NA	Xinluzao 84	26	3	3	4796	4175	323	253	-0.1387
			44°33′N	85°98′E	NA	1950	200	Loam	NA	NA	2478	8	150	NA	Xinluzao 84	26	3	3	5223	4586	214	370	-0.1301
			44°33′N	85°98′E	NA	1950	200	Loam	NA	NA	2478	8	225	NA	Xinluzao 84	26	3	3	6057	5096	268	109	-0.1728
			44°33′N	85°98′E	NA	1950	200	Loam	NA	NA	2478	8	300	NA	Xinluzao 84	26	3	3	6793	5571	363	471	-0.1983
			44°33′N	85°98′E	NA	1950	200	Loam	NA	NA	2478	8	375	NA	Xinluzao 84	26	3	3	5783	5526	532	306	-0.0455
			44°33′N	85°98′E	NA	1950	200	Loam	NA	NA	3305	8	0	NA	Xinluzao 84	26	3	3	4796	4535	323	153	-0.056
			44°33′N	85°98′E	NA	1950	200	Loam	NA	NA	3305	8	150	NA	Xinluzao 84	26	3	3	5223	5109	214	425	-0.0221
			44°33′N	85°98′E	NA	1950	200	Loam	NA	NA	3305	8	225	NA	Xinluzao 84	26	3	3	6057	5935	268	319	-0.0203
			44°33′N	85°98′E	NA	1950	200	Loam	NA	NA	3305	8	300	NA	Xinluzao 84	26	3	3	6793	7065	363	619	0.0393
			44°33′N	85°98′E	NA	1950	200	Loam	NA	NA	3305	8	375	NA	Xinluzao 84	26	3	3	5783	6078	532	329	0.0498
32	Yang, S.L.et al.	Key Irrigation Experimental Station of Water Conservancy Management Office of Bayingolin Mongolian Autonomous Prefecture, Xinjiang	41°36′N	86°12′E	NA	2250	50	Sandy soil	7.25	58.7	3300	13	150	NA	Xinluzhong26	NA	3	3	5970	5136	597	513.6	-0.1505
			41°36′N	86°12′E	NA	2250	50	Sandy soil	7.25	58.7	3300	13	225	NA	Xinluzhong26	NA	3	3	6435.77	5867.95	643.577	586.795	-0.0924
			41°36′N	86°12′E	NA	2250	50	Sandy soil	7.25	58.7	3300	13	300	NA	Xinluzhong26	NA	3	3	6992.33	6453.3	699.233	645.33	-0.0802
			41°36′N	86°12′E	NA	2250	50	Sandy soil	7.25	58.7	3300	13	375	NA	Xinluzhong26	NA	3	3	6724.5	6382.05	672.45	638.205	-0.0523
33	Lin, T.et al.	Desert Oasis Cultivation and Cultivation Field Comprehensive Observation and Experimental Station of the Ministry of Agriculture and Rural Affairs of Awati County, Xinjiang	41°06′N	80°44′E	10.4	1890.7	46.7	Sandy loam	4.8	4.3	2251	9	508.5	One film, two tubes, six rows	Xinluzhong54	NA	3	3	6300	5080	290	140	-0.2152
			41°06′N	80°44′E	10.4	1890.7	46.7	Sandy loam	4.8	4.3	2851	9	508.5	One film, two tubes, six rows	Xinluzhong54	NA	3	3	6300	5180	290	160	-0.1957
			41°06′N	80°44′E	10.4	1890.7	46.7	Sandy loam	4.8	4.3	3452	9	508.5	One film, two tubes, six rows	Xinluzhong54	NA	3	3	6300	5690	290	260	-0.1018
			41°06′N	80°44′E	10.4	1890.7	46.7	Sandy loam	4.8	4.3	2251	9	508.5	One film, two tubes, six rows	Xinluzhong54	NA	3	3	5000	3850	210	110	-0.2614
			41°06′N	80°44′E	10.4	1890.7	46.7	Sandy loam	4.8	4.3	2851	9	508.5	One film, two tubes, six rows	Xinluzhong54	NA	3	3	5000	4370	210	250	-0.1347
			41°06′N	80°44′E	10.4	1890.7	46.7	Sandy loam	4.8	4.3	3452	9	508.5	One film, two tubes, six rows	Xinluzhong54	NA	3	3	5000	4850	210	310	-0.0305
			41°06′N	80°44′E	10.4	1890.7	46.7	Sandy loam	4.8	4.3	2251	9	508.5	One film, two tubes, six rows	Xinluzhong54	NA	3	3	6000	5360	230	210	-0.1128
			41°06′N	80°44′E	10.4	1890.7	46.7	Sandy loam	4.8	4.3	2851	9	508.5	One film, two tubes, six rows	Xinluzhong54	NA	3	3	6000	5460	230	190	-0.0943
			41°06′N	80°44′E	10.4	1890.7	46.7	Sandy loam	4.8	4.3	3452	9	508.5	One film, two tubes, six rows	Xinluzhong54	NA	3	3	6000	5740	230	420	-0.0443
34	Shi, H.L.	Xinjiang Aksu Awati County Harvest 2 Harvest 1 Lian Xinjiang Academy of Agricultural Sciences Economic Workshop	40°38′N	80°22′E	NA	NA	NA	Loam	NA	NA	2800	10	0	NA	Xinluzhong54	24.25	3	3	4041.9	3808.4	404.19	380.84	-0.0595
			40°38′N	80°22′E	NA	NA	NA	Loam	NA	NA	2800	10	150	NA	Xinluzhong54	24.25	3	3	4629.6	4479.2	462.96	447.92	-0.033
			40°38′N	80°22′E	NA	NA	NA	Loam	NA	NA	2800	10	300	NA	Xinluzhong54	24.25	3	3	6464.2	6337.9	646.42	633.79	-0.0197
			40°38′N	80°22′E	NA	NA	NA	Loam	NA	NA	2800	10	450	NA	Xinluzhong54	24.25	3	3	6053.6	6018.3	605.36	601.83	-0.0058
35	Li, Y.Y.	Experimental base of soil improvement station in Shihezi Fort Town, Xinjiang	44°49′N	85°34′E	NA	1900	150	NA	4.3442	80	2850	8	NA	One film, one tube, four rows	NA	24.75	3	3	4039.95	3335.05	403.995	333.505	-0.1917
36	Feng,X.D.	Shihezi City, Xinjiang Academy of Agricultural Reclamation Sciences Test Site	44°20′N	85°20′E	NA	1802.5	166.35	Sandy loam	7.134	60.5	3001	9	350	One film, two tubes, four rows	Xinluzao32	18.4	3	3	5452.69	4733.41	545.269	473.341	-0.1415
			44°20′N	85°20′E	NA	1802.5	166.35	Sandy loam	7.134	60.5	3001	9	250	One film, two tubes, four rows	Xinluzao32	18.4	3	3	5507.46	4741.32	550.746	474.132	-0.1498
			44°20′N	85°20′E	NA	1802.5	166.35	Sandy loam	7.134	60.5	3001	9	150	One film, two tubes, four rows	Xinluzao32	18.4	3	3	5273.53	4725.91	527.353	472.591	-0.1096
37	Wang, H.D.	Shihezi City, Xinjiang Academy of Agricultural Reclamation Sciences Test Site	44°20′N	85°20′E	NA	NA	121	Sandy soil	10.44	79.76	2611	9	150	one film, three tubes, six rows	Xinken 1	NA	3	3	5032.99	4112.28	503.299	411.228	-0.202
			44°20′N	85°20′E	NA	NA	121	Sandy soil	10.44	79.76	2611	9	200	one film, three tubes, six rows	Xinken 1	NA	3	3	5107.61	4289.06	510.761	428.906	-0.1747
			44°20′N	85°20′E	NA	NA	121	Sandy soil	10.44	79.76	2611	9	250	one film, three tubes, six rows	Xinken 1	NA	3	3	6690.64	4730.47	669.064	473.047	-0.3467
			44°20′N	85°20′E	NA	NA	121	Sandy soil	10.44	79.76	2611	9	300	one film, three tubes, six rows	Xinken 1	NA	3	3	7075.01	5701.81	707.501	570.181	-0.2158
			44°20′N	85°20′E	NA	NA	121	Sandy soil	10.44	79.76	2611	9	350	one film, three tubes, six rows	Xinken 1	NA	3	3	5964.19	5346.68	596.419	534.668	-0.1093
			44°20′N	85°20′E	NA	NA	121	Sandy soil	10.44	79.76	3282	9	150	one film, three tubes, six rows	Xinken 1	NA	3	3	5032.99	4506.08	503.299	450.608	-0.1106
			44°20′N	85°20′E	NA	NA	121	Sandy soil	10.44	79.76	3282	9	200	one film, three tubes, six rows	Xinken 1	NA	3	3	5107.61	4774.34	510.761	477.434	-0.0675
			44°20′N	85°20′E	NA	NA	121	Sandy soil	10.44	79.76	3282	9	250	one film, three tubes, six rows	Xinken 1	NA	3	3	6690.64	5769.66	669.064	576.966	-0.1481
			44°20′N	85°20′E	NA	NA	121	Sandy soil	10.44	79.76	3282	9	300	one film, three tubes, six rows	Xinken 1	NA	3	3	7075.01	6576.78	707.501	657.678	-0.073
			44°20′N	85°20′E	NA	NA	121	Sandy soil	10.44	79.76	3282	9	350	one film, three tubes, six rows	Xinken 1	NA	3	3	5964.19	6181.33	596.419	618.133	0.0358
38	Zhong, Z.B	Shihezi Scientific Observation and Experimental Station of Crop Efficient Water Use of the Ministry of Agriculture	45°38′N	86°09′E	8.6	1742	204	Sandy soil	4.1412	34.3	3000	9	300	one film, three tubes, six rows	Xinluzao 60	NA	3	3	6256.5	4891.5	625.65	489.15	-0.2461
			45°38′N	86°09′E	8.6	1742	204	Sandy soil	4.1412	34.3	3000	9	262.5	one film, three tubes, six rows	Xinluzao 60	NA	3	3	6460.5	5226	646.05	522.6	-0.2121
			45°38′N	86°09′E	8.6	1742	204	Sandy soil	4.1412	34.3	3000	9	225	one film, three tubes, six rows	Xinluzao 60	NA	3	3	5593.5	4615.5	559.35	461.55	-0.1922
39	Wu，L.F.	Xinjiang Agricultural Star Academy of Sciences Water-saving Irrigation Experimental Station	43°57′N	87°29′E	NA	NA	121	Sandy soil	10.44	79.76	2911	9	150	one film, three tubes, six rows	Xinluzao 33	NA	3	3	5260.85	4033.01	69.83	69.8	-0.2658
			43°57′N	87°29′E	NA	NA	121	Sandy soil	10.44	79.76	2911	9	200	one film, three tubes, six rows	Xinluzao 33	NA	3	3	5314.38	4138.92	17.45	17.46	-0.25
			43°57′N	87°29′E	NA	NA	121	Sandy soil	10.44	79.76	2911	9	250	one film, three tubes, six rows	Xinluzao 33	NA	3	3	5577.39	4524.14	69.82	69.82	-0.2093
			43°57′N	87°29′E	NA	NA	121	Sandy soil	10.44	79.76	2911	9	300	one film, three tubes, six rows	Xinluzao 33	NA	3	3	5753.1	4438.05	34.91	17.46	-0.2595
			43°57′N	87°29′E	NA	NA	121	Sandy soil	10.44	79.76	2911	9	350	one film, three tubes, six rows	Xinluzao 33	NA	3	3	5614.63	4474.12	17.45	17.45	-0.2271
			43°57′N	87°29′E	NA	NA	121	Sandy soil	10.44	79.76	2671	9	150	one film, three tubes, six rows	Xinluzao 33	NA	3	3	5511.03	4312.3	122.18	34.91	-0.2453
			43°57′N	87°29′E	NA	NA	121	Sandy soil	10.44	79.76	2671	9	200	one film, three tubes, six rows	Xinluzao 33	NA	3	3	5704.21	4522.94	104.71	69.82	-0.232
			43°57′N	87°29′E	NA	NA	121	Sandy soil	10.44	79.76	2671	9	250	one film, three tubes, six rows	Xinluzao 33	NA	3	3	5914.86	4611.39	34.92	122.19	-0.2489
			43°57′N	87°29′E	NA	NA	121	Sandy soil	10.44	79.76	2671	9	300	one film, three tubes, six rows	Xinluzao 33	NA	3	3	5828.72	4455.49	104.74	17.45	-0.2687
			43°57′N	87°29′E	NA	NA	121	Sandy soil	10.44	79.76	2671	9	350	one film, three tubes, six rows	Xinluzao 33	NA	3	3	5760.06	4421.79	104.74	139.65	-0.2644
			43°57′N	87°29′E	NA	NA	121	Sandy soil	10.44	79.76	3292	9	150	one film, three tubes, six rows	Xinluzao 33	NA	3	3	5511.03	4859.35	122.18	122.2	-0.1258
			43°57′N	87°29′E	NA	NA	121	Sandy soil	10.44	79.76	3292	9	200	one film, three tubes, six rows	Xinluzao 33	NA	3	3	5704.21	5436.55	104.71	34.91	-0.0481
			43°57′N	87°29′E	NA	NA	121	Sandy soil	10.44	79.76	3292	9	250	one film, three tubes, six rows	Xinluzao 33	NA	3	3	5914.86	5577.37	34.92	52.37	-0.0588
			43°57′N	87°29′E	NA	NA	121	Sandy soil	10.44	79.76	3292	9	300	one film, three tubes, six rows	Xinluzao 33	NA	3	3	5828.72	5578.54	104.74	69.83	-0.0439
			43°57′N	87°29′E	NA	NA	121	Sandy soil	10.44	79.76	3292	9	350	one film, three tubes, six rows	Xinluzao 33	NA	3	3	5760.06	5509.86	104.74	17.46	-0.0444
40	Li, X.X.et al.	Shihezi Irrigation District, Xinjiang	43°21′N	84°43′E	7.85	1991.5	225	NA	10.846	67.53	3602	10	210	NA	NA	NA	3	3	5607	4757	560.7	475.7	-0.1644
			43°21′N	84°43′E	7.85	1991.5	225	NA	10.846	67.53	3602	10	280	NA	NA	NA	3	3	6164	5235	616.4	523.5	-0.1634
			43°21′N	84°43′E	7.85	1991.5	225	NA	10.846	67.53	3602	10	350	NA	NA	NA	3	3	5954	4979	595.4	497.9	-0.1788
41	Huang, J.et al.	Shihezi City of the Xinjiang UygurAutonomous Region	44°17′N	85°49′E	7.7	1661.1	220	NA	9.2626	NA	3011	6	NA	NA	NA	NA	4	4	6356	5683	1692	442	-0.1119
			44°17′N	85°49′E	7.7	1661.1	220	NA	9.2626	NA	3327	6	NA	NA	NA	NA	4	4	6356	5390	1692	1011	-0.1649
			44°17′N	85°49′E	7.7	1661.1	220	NA	9.2626	NA	3465	6	NA	NA	NA	NA	4	4	6356	5554	1692	1438	-0.1349
			44°17′N	85°49′E	7.7	1661.1	220	NA	9.2626	NA	3274	6	NA	NA	NA	NA	4	4	6356	4692	1692	255	-0.3035
			44°17′N	85°49′E	7.7	1661.1	220	NA	9.2626	NA	3508	6	NA	NA	NA	NA	4	4	6356	7365	1692	1249	0.1473
			44°17′N	85°49′E	7.7	1661.1	220	NA	9.2626	NA	2751	6	NA	NA	NA	NA	4	4	6356	6694	1692	504	0.0518
			44°17′N	85°49′E	7.7	1661.1	220	NA	9.2626	NA	3550	6	NA	NA	NA	NA	4	4	6356	5798	1692	757	-0.0919
42	Zheng, Y.K.et al.	The 125th Regiment of the Seventh Agricultural Division of the Xinjiang Corps	44°20′N	83°51′E	NA	1509.7	197.5	Loam	NA	19	3300	NA	NA	One film, one tube, four rows	NA	NA	3	3	5261.1	4873.65	526.11	487.365	-0.0765
			44°20′N	83°51′E	NA	1509.7	197.5	Loam	NA	19	3300	NA	NA	One film, one tube, four rows	NA	NA	3	3	5166.9	4710	516.69	471	-0.0926
			44°20′N	83°51′E	NA	1509.7	197.5	Loam	NA	19	3300	NA	NA	One film, one tube, four rows	NA	NA	3	3	4567.05	4469.4	456.705	446.94	-0.0216
43	Huang, Z.Z.et al.	Cotton Breeding Experimental Base of Xinjiang Agricultural University, Shawan County, Tacheng Prefecture, Xinjiang	44°44′N	85°67′E	6.6	1721	189	Loam	4.0774	19.64	3434	8	285	One film, two tubes, six rows	NA	NA	3	3	5784	5821	578.4	582.1	0.0064
			44°44′N	85°67′E	6.6	1721	189	Loam	4.0774	19.64	2907	8	285	One film, two tubes, six rows	NA	NA	3	3	5784	4442	578.4	444.2	-0.264
			44°44′N	85°67′E	6.6	1721	189	Loam	4.0774	19.64	3434	8	285	One film, three tubes, six rows	NA	NA	3	3	5519	6078	551.9	607.8	0.0965
			44°44′N	85°67′E	6.6	1721	189	Loam	4.0774	19.64	2907	8	285	One film, three tubes, six rows	NA	NA	3	3	5519	4974	551.9	497.4	-0.104
44	Hou, X.H.et al.	located in Korla, Xinjiang, China	40°53′N	86°56′E	11	NA	56	Sandy soil	NA	NA	2193	8	NA	NA	NA	22.5	3	3	6219.12	5549.8	15.94	31.87	-0.1139
			40°53′N	86°56′E	11	NA	56	Sandy soil	NA	NA	2814	8	NA	NA	NA	22.5	3	3	6219.12	5996.02	15.94	31.88	-0.0365
			40°53′N	86°56′E	11	NA	56	Sandy soil	NA	NA	3435	8	NA	NA	NA	22.5	3	3	6219.12	6203.19	15.94	159.36	-0.0026
			40°53′N	86°56′E	11	NA	56	Sandy soil	NA	NA	1963	8	NA	NA	NA	22.5	3	3	5948.21	5087.65	47.81	63.75	-0.1563
			40°53′N	86°56′E	11	NA	56	Sandy soil	NA	NA	2567	8	NA	NA	NA	22.5	3	3	5948.21	5709.16	47.81	79.68	-0.041
			40°53′N	86°56′E	11	NA	56	Sandy soil	NA	NA	3171	8	NA	NA	NA	22.5	3	3	5948.21	5932.27	47.81	127.49	-0.0027
45	Zhang, D.M.et al.	Southern Tumushuke city, Xinjiang, China	39°51′N	79°3′E	NA	NA	100.3	NA	3.38	47.97	3650	NA	NA	NA	NA	NA	3	3	6323	6152	632.3	615.2	-0.0274
			39°51′N	79°3′E	NA	NA	100.3	NA	3.38	47.97	3300	NA	NA	NA	NA	NA	3	3	6323	5612	632.3	561.2	-0.1193
			39°51′N	79°3′E	NA	NA	100.3	NA	3.38	47.97	2950	NA	NA	NA	NA	NA	3	3	6323	4751	632.3	475.1	-0.2858
			39°51′N	79°3′E	NA	NA	100.3	NA	3.38	47.97	3200	NA	NA	NA	NA	NA	3	3	6206	6423	620.6	642.3	0.0344
			39°51′N	79°3′E	NA	NA	100.3	NA	3.38	47.97	3200	NA	NA	NA	NA	NA	3	3	6399	5888	639.9	588.8	-0.0832
			39°51′N	79°3′E	NA	NA	100.3	NA	3.38	47.97	3200	NA	NA	NA	NA	NA	3	3	5934	5491	593.4	549.1	-0.0776
46	Yang, C.J.et al.	Experimental Irrigation Station of Shi-hezi University in Xinjiang, China,	44°19′N	85°59′E	7	1664	210	NA	NA	NA	3191	8	NA	NA	NA	NA	3	3	4368	3732.3	436.8	373.23	-0.1573
			44°19′N	85°59′E	7	1664	210	NA	NA	NA	2521	8	NA	NA	NA	NA	3	3	4368	3175.2	436.8	317.52	-0.3189
			44°19′N	85°59′E	7	1664	210	NA	NA	NA	3432	8	NA	NA	NA	NA	3	3	4347.2	4081.7	434.72	408.17	-0.063
			44°19′N	85°59′E	7	1664	210	NA	NA	NA	2651	8	NA	NA	NA	NA	3	3	4347.2	3339	434.72	333.9	-0.2639
			44°19′N	85°59′E	7	1664	210	NA	NA	NA	2141	8	NA	NA	NA	NA	3	3	4347.2	2717.8	434.72	271.78	-0.4697
47	Wang, H.D.et al.	Test Station of the Xinjiang Academy of Agricultural Reclamation Sciences in Shihezi, Xinjiang Province, China.	44°18′N	85°58′E	NA	NA	121	Sandy soil	10.44	79.76	2911	9	150	One film, three tubes, six rows	Xinluzao 33	NA	3	3	5161.94	4008.1	60.73	60.73	-0.253
			44°18′N	85°58′E	NA	NA	121	Sandy soil	10.44	79.76	2911	9	200	One film, three tubes, six rows	Xinluzao 33	NA	3	3	5283.4	4068.83	30.36	30.37	-0.2612
			44°18′N	85°58′E	NA	NA	121	Sandy soil	10.44	79.76	2911	9	250	One film, three tubes, six rows	Xinluzao 33	NA	3	3	5647.77	4493.93	60.73	30.37	-0.2285
			44°18′N	85°58′E	NA	NA	121	Sandy soil	10.44	79.76	2911	9	300	One film, three tubes, six rows	Xinluzao 33	NA	3	3	5708.5	4433.2	60.73	60.73	-0.2528
			44°18′N	85°58′E	NA	NA	121	Sandy soil	10.44	79.76	2911	9	350	One film, three tubes, six rows	Xinluzao 33	NA	3	3	5617.41	4524.29	60.73	30.36	-0.2164
			44°18′N	85°58′E	NA	NA	121	Sandy soil	10.44	79.76	3302	9	150	One film, three tubes, six rows	Xinluzao 33	NA	3	3	5526.32	4858.3	30.36	30.36	-0.1288
			44°18′N	85°58′E	NA	NA	121	Sandy soil	10.44	79.76	2671	9	200	One film, three tubes, six rows	Xinluzao 33	NA	3	3	5526.32	4311.74	30.36	30.36	-0.2482
			44°18′N	85°58′E	NA	NA	121	Sandy soil	10.44	79.76	3302	9	250	One film, three tubes, six rows	Xinluzao 33	NA	3	3	5708.5	5404.86	60.73	91.09	-0.0547
			44°18′N	85°58′E	NA	NA	121	Sandy soil	10.44	79.76	2671	9	300	One film, three tubes, six rows	Xinluzao 33	NA	3	3	5708.5	4493.93	60.73	30.36	-0.2392
			44°18′N	85°58′E	NA	NA	121	Sandy soil	10.44	79.76	3302	9	350	One film, three tubes, six rows	Xinluzao 33	NA	3	3	5890.69	5587.04	60.73	60.73	-0.0529
			44°18′N	85°58′E	NA	NA	121	Sandy soil	10.44	79.76	2671	9	150	One film, three tubes, six rows	Xinluzao 33	NA	3	3	5890.69	4645.75	60.73	60.73	-0.2374
			44°18′N	85°58′E	NA	NA	121	Sandy soil	10.44	79.76	3302	9	200	One film, three tubes, six rows	Xinluzao 33	NA	3	3	5829.96	5587.04	60.73	60.72	-0.0426
			44°18′N	85°58′E	NA	NA	121	Sandy soil	10.44	79.76	2671	9	250	One film, three tubes, six rows	Xinluzao 33	NA	3	3	5829.96	4433.2	60.73	60.73	-0.2739
			44°18′N	85°58′E	NA	NA	121	Sandy soil	10.44	79.76	3302	9	300	One film, three tubes, six rows	Xinluzao 33	NA	3	3	5769.23	5526.32	60.76	60.73	-0.043
			44°18′N	85°58′E	NA	NA	121	Sandy soil	10.44	79.76	2671	9	350	One film, three tubes, six rows	Xinluzao 33	NA	3	3	5769.23	4402.83	60.76	30.37	-0.2703
			44°18′N	85°58′E	NA	NA	121	Sandy soil	10.44	79.76	3282	9	150	One film, three tubes, six rows	Xinken 1	NA	3	3	5040.49	4524.29	30.37	30.37	-0.108
			44°18′N	85°58′E	NA	NA	121	Sandy soil	10.44	79.76	2611	9	200	One film, three tubes, six rows	Xinken 1	NA	3	3	5040.49	4129.55	30.37	60.72	-0.1993
			44°18′N	85°58′E	NA	NA	121	Sandy soil	10.44	79.76	3282	9	250	One film, three tubes, six rows	Xinken 1	NA	3	3	5101.21	4797.57	30.36	70.73	-0.0614
			44°18′N	85°58′E	NA	NA	121	Sandy soil	10.44	79.76	2611	9	300	One film, three tubes, six rows	Xinken 1	NA	3	3	5101.21	4311.74	30.36	30.36	-0.1681
			44°18′N	85°58′E	NA	NA	121	Sandy soil	10.44	79.76	3282	9	350	One film, three tubes, six rows	Xinken 1	NA	3	3	6710.53	5769.23	30.37	30.37	-0.1511
			44°18′N	85°58′E	NA	NA	121	Sandy soil	10.44	79.76	2611	9	150	One film, three tubes, six rows	Xinken 1	NA	3	3	6710.53	4736.84	30.37	60.73	-0.3483
			44°18′N	85°58′E	NA	NA	121	Sandy soil	10.44	79.76	3282	9	200	One film, three tubes, six rows	Xinken 1	NA	3	3	7074.9	6589.07	30.36	30.37	-0.0711
			44°18′N	85°58′E	NA	NA	121	Sandy soil	10.44	79.76	2611	9	250	One film, three tubes, six rows	Xinken 1	NA	3	3	7074.9	5708.5	30.36	30.36	-0.2146
			44°18′N	85°58′E	NA	NA	121	Sandy soil	10.44	79.76	3282	9	300	One film, three tubes, six rows	Xinken 1	NA	3	3	5951.42	6163.97	30.36	60.73	0.0351
			44°18′N	85°58′E	NA	NA	121	Sandy soil	10.44	79.76	2611	9	350	One film, three tubes, six rows	Xinken 1	NA	3	3	5951.42	5374.49	30.36	30.36	-0.102
48	He, P.R.et al.	Korla city, Xinjiang	40°53′N	86°56′E	NA	2417	135.4	Sandy soil	NA	NA	3338	10	300	NA	Xinluzhong 66	NA	3	3	7233.2	7146.5	723.32	714.65	-0.0121
			40°53′N	86°56′E	NA	2417	135.4	Sandy soil	NA	NA	2530	6	300	NA	Xinluzhong 66	NA	3	3	7233.2	6577.3	723.32	657.73	-0.0951
			40°53′N	86°56′E	NA	2417	135.4	Sandy soil	NA	NA	2267	4	300	NA	Xinluzhong 66	NA	3	3	7233.2	6127.4	723.32	612.74	-0.1659
			40°53′N	86°56′E	NA	2417	135.4	Sandy soil	NA	NA	2018	3	300	NA	Xinluzhong 66	NA	3	3	7233.2	5988.4	723.32	598.84	-0.1889
49	Hou, X.H.et al.	Experimental station located in Korla, Xinjiang, China	40°53′N	86°56′E	11	NA	56	Sandy soil	NA	NA	2193	8	250	NA	NA	NA	3	3	5831.71	5114.63	583.171	511.463	-0.1312
			40°53′N	86°56′E	11	NA	56	Sandy soil	NA	NA	2814	8	250	NA	NA	NA	3	3	5831.71	5582.93	583.171	558.293	-0.0436
			40°53′N	86°56′E	11	NA	56	Sandy soil	NA	NA	3435	8	250	NA	NA	NA	3	3	5831.71	5824.39	583.171	582.439	-0.0013
			40°53′N	86°56′E	11	NA	56	Sandy soil	NA	NA	2193	8	300	NA	NA	NA	3	3	6212.2	5546.34	621.22	554.634	-0.1134
			40°53′N	86°56′E	11	NA	56	Sandy soil	NA	NA	2814	8	300	NA	NA	NA	3	3	6212.2	5985.37	621.22	598.537	-0.0372
			40°53′N	86°56′E	11	NA	56	Sandy soil	NA	NA	3435	8	300	NA	NA	NA	3	3	6212.2	6197.56	621.22	619.756	-0.0024
			40°53′N	86°56′E	11	NA	56	Sandy soil	NA	NA	2193	8	350	NA	NA	NA	3	3	6643.9	5941.46	664.39	594.146	-0.1117
			40°53′N	86°56′E	11	NA	56	Sandy soil	NA	NA	2814	8	350	NA	NA	NA	3	3	6643.9	6395.12	664.39	639.512	-0.0382
			40°53′N	86°56′E	11	NA	56	Sandy soil	NA	NA	3435	8	350	NA	NA	NA	3	3	6643.9	6651.22	664.39	665.122	0.0011
			40°53′N	86°56′E	11	NA	56	Sandy soil	NA	NA	2193	8	400	NA	NA	NA	3	3	6548.78	5941.46	654.878	594.146	-0.0973
			40°53′N	86°56′E	11	NA	56	Sandy soil	NA	NA	2814	8	400	NA	NA	NA	3	3	6548.78	6329.27	654.878	632.927	-0.0341
			40°53′N	86°56′E	11	NA	56	Sandy soil	NA	NA	3435	8	400	NA	NA	NA	3	3	6548.78	6519.51	654.878	651.951	-0.0045
			40°53′N	86°56′E	11	NA	56	Sandy soil	NA	NA	1963	8	250	NA	NA	NA	3	3	5626.83	4631.71	562.683	463.171	-0.1946
			40°53′N	86°56′E	11	NA	56	Sandy soil	NA	NA	2567	8	250	NA	NA	NA	3	3	5626.83	5209.76	562.683	520.976	-0.077
			40°53′N	86°56′E	11	NA	56	Sandy soil	NA	NA	3171	8	250	NA	NA	NA	3	3	5626.83	5685.37	562.683	568.537	0.0103
			40°53′N	86°56′E	11	NA	56	Sandy soil	NA	NA	1963	8	300	NA	NA	NA	3	3	5948.78	5078.05	594.878	507.805	-0.1583
			40°53′N	86°56′E	11	NA	56	Sandy soil	NA	NA	2567	8	300	NA	NA	NA	3	3	5948.78	5700	594.878	570	-0.0427
			40°53′N	86°56′E	11	NA	56	Sandy soil	NA	NA	3171	8	300	NA	NA	NA	3	3	5948.78	5912.2	594.878	591.22	-0.0062
			40°53′N	86°56′E	11	NA	56	Sandy soil	NA	NA	1963	8	350	NA	NA	NA	3	3	6292.68	5568.29	629.268	556.829	-0.1223
			40°53′N	86°56′E	11	NA	56	Sandy soil	NA	NA	2567	8	350	NA	NA	NA	3	3	6292.68	6029.27	629.268	602.927	-0.0428
			40°53′N	86°56′E	11	NA	56	Sandy soil	NA	NA	3171	8	350	NA	NA	NA	3	3	6292.68	6307.32	629.268	630.732	0.0023
			40°53′N	86°56′E	11	NA	56	Sandy soil	NA	NA	1963	8	400	NA	NA	NA	3	3	6263.41	5656.1	626.341	565.61	-0.102
			40°53′N	86°56′E	11	NA	56	Sandy soil	NA	NA	2567	8	400	NA	NA	NA	3	3	6263.41	5919.51	626.341	591.951	-0.0565
			40°53′N	86°56′E	11	NA	56	Sandy soil	NA	NA	3171	8	400	NA	NA	NA	3	3	6263.41	6263.41	626.341	626.341	0

## Sheet: Water use efficiency
Data included in the meta-analysis
Number	Reference	Experimental station	Latitude	Longitude	Climatic conditions			Soil conditions			Management measures						NC	NE	MC	ME	SDc	SDe	WUE(LnR)
					Annual temperature(°C)	Annual evaporation(mm)	Annual precipitation(mm)	Soil texture	Initial soil organic carbon(g/kg)	Initial soil available nitrogen(mg/kg)	Irrigation amount(m3/ha)	Irrigation frequency	Nitrogen application(kg/ha)	Drip tape mode	Variety	Planting density(10,000 plants /ha)
1	He, P.R.et al.	Yuli County, Korla City, Xinjiang	40°53′N	86°56′E	11	2417	58	Sandy soil	NA	NA	3342	12	300	One film, two tubes, four rows	Xinluzhong 66	NA	3	3	1.27	1.4	0.127	0.14	0.0975
			40°53′N	86°56′E	11	2417	58	Sandy soil	NA	NA	2531	7	300	One film, two tubes, four rows	Xinluzhong 66	NA	3	3	1.27	1.51	0.127	0.151	0.1731
			40°53′N	86°56′E	11	2417	58	Sandy soil	NA	NA	2271	5	300	One film, two tubes, four rows	Xinluzhong 66	NA	3	3	1.27	1.49	0.127	0.149	0.1598
			40°53′N	86°56′E	11	2417	58	Sandy soil	NA	NA	2011	4	300	One film, two tubes, four rows	Xinluzhong 66	NA	3	3	1.27	1.63	0.127	0.163	0.2496
2	Pan, J.J.et al.	Modern irrigation demonstration site in Dafeng Town, Hutubi County, Changji Prefecture	44°10′N	86°37′E	5.5	NA	167	Sandy loam	5.5448	35.42	3527	NA	NA	one film, three tubes, six rows	Xinluzao 57	NA	3	3	1.032	1.036	0.1032	0.1036	0.0039
			44°10′N	86°37′E	5.5	NA	167	Sandy loam	5.5448	35.42	3001	NA	NA	one film, three tubes, six rows	Xinluzao 57	NA	3	3	1.032	1.149	0.1032	0.1149	0.1074
			44°10′N	86°37′E	5.5	NA	167	Sandy loam	5.5448	35.42	3159	NA	NA	one film, three tubes, six rows	Xinluzao 57	NA	3	3	1.032	1.135	0.1032	0.1135	0.0951
			44°10′N	86°37′E	5.5	NA	167	Sandy loam	5.5448	35.42	3392	NA	NA	one film, three tubes, six rows	Xinluzao 57	NA	3	3	1.032	1.057	0.1032	0.1057	0.0239
3	Wu, F.Q.et al.	Awati County, Aksu City, Xinjiang Uygur Autonomous Region	40°10′N	80°50′E	NA	NA	NA	NA	4.002	NA	2250	12	NA	NA	Xinluzhong 47	NA	6	6	1.85	2.24	0.185	0.224	0.1913
			40°10′N	80°50′E	NA	NA	NA	NA	4.002	NA	2850	13	NA	NA	Xinluzhong 47	NA	6	6	1.85	1.93	0.185	0.193	0.0423
			40°10′N	80°50′E	NA	NA	NA	NA	4.002	NA	3450	13	NA	NA	Xinluzhong 47	NA	6	6	1.85	1.87	0.185	0.187	0.0108
4	Li, N.N.et al.	Agronomy Experimental Station of Shihezi University	45°19′N	86°03′E	NA	NA	NA	Medium loam	7.25	54.9	3360	NA	NA	NA	Xinluzao 45	20.8	4	4	1.54167	1.70833	0.07143	0.05357	0.1027
			45°19′N	86°03′E	NA	NA	NA	Medium loam	7.25	54.9	2800	NA	NA	NA	Xinluzao 45	20.8	4	4	1.54167	1.82143	0.07143	0.01786	0.1668
5	Wang, J.C.et al.	Experimental Station of the Institute of Water Construction, Tarim University	40°22′N	80°30′E	11.2	1988.4	45.7	Sandy loam	NA	54.2	3000	9	555	One film, one tube, two rows	Zhaofeng No.1	18	3	3	1.32	1.48	0.132	0.148	0.1144
			40°22′N	80°30′E	11.2	1988.4	45.7	Sandy loam	NA	54.2	1875	9	555	One film, one tube, two rows	Zhaofeng No.1	18	3	3	1.32	1.2	0.132	0.12	-0.0953
			40°22′N	80°30′E	11.2	1988.4	45.7	Sandy loam	NA	54.2	750	9	555	One film, one tube, two rows	Zhaofeng No.1	18	3	3	1.32	0.82	0.132	0.082	-0.4761
6	Wang, L.et al.	Experimental base of Xinjiang Awati County Academy of Agricultural Sciences	40°06′N	80°44′E	10.4	1890.7	46.7	Sandy loam	NA	NA	2400	10	310.5	One film, two tubes, six rows	NA	24	4	4	0.96	1.41	0.096	0.141	0.3844
			40°06′N	80°44′E	10.4	1890.7	46.7	Sandy loam	NA	NA	3000	10	310.5	One film, two tubes, six rows	NA	24	4	4	0.96	1.31	0.096	0.131	0.3108
			40°06′N	80°44′E	10.4	1890.7	46.7	Sandy loam	NA	NA	3600	10	310.5	One film, two tubes, six rows	NA	24	4	4	0.96	1.21	0.096	0.121	0.2314
7	Dou, Q.Q.	Qubian Village, Sidaohezi Town, Shawan County, Xinjiang	44°29′N	85°57′E	NA	1750	246	Clay loam soil	6.496	66.43	3350	8	NA	NA	Xinluzao 50	21.93	3	3	1.26	1.3	0.126	0.13	0.0313
			44°29′N	85°57′E	NA	1750	246	Clay loam soil	6.496	66.43	2950	8	NA	NA	Xinluzao 50	21.93	3	3	1.26	1.25	0.126	0.125	-0.008
			44°29′N	85°57′E	NA	1750	246	Clay loam soil	6.496	66.43	3350	8	NA	NA	Xinluzao 73	21.93	3	3	1.53	1.6	0.153	0.16	0.0447
			44°29′N	85°57′E	NA	1750	246	Clay loam soil	6.496	66.43	2950	8	NA	NA	Xinluzao 73	21.93	3	3	1.53	1.57	0.153	0.157	0.0258
8	Fan, K.	Soil and Water Conservation Experimental Station of the Water Conservancy Bureau of the First Division of the Xinjiang Production and Construction Corps	40°6′N	81°2′E	11.3	2217.75	45.7	NA	NA	NA	2641	11	NA	One film, two tubes, six rows	Xinluzhong 46	NA	3	3	0.73	0.75	0.073	0.075	0.027
			40°6′N	81°2′E	11.3	2217.75	45.7	NA	NA	NA	3302	11	NA	One film, two tubes, six rows	Xinluzhong 46	NA	3	3	0.73	0.78	0.073	0.078	0.0662
			40°6′N	81°2′E	11.3	2217.75	45.7	NA	NA	NA	2641	11	NA	One film, two tubes, six rows	Xinluzhong 46	NA	3	3	0.73	0.86	0.073	0.086	0.1639
			40°6′N	81°2′E	11.3	2217.75	45.7	NA	NA	NA	3302	11	NA	One film, two tubes, six rows	Xinluzhong 46	NA	3	3	0.73	0.8	0.073	0.08	0.0916
9	Li, G.	The third team of Chuangtian in Liuhudi Town, Manas County, Changji Prefecture, Xinjiang	44°39′N	86°08′E	8.2	1967	109.6	Clay loam soil	1.131	51.05	2900	8	NA	One film, two tubes, six rows	Xinluzao 57	24	3	3	0.83	0.92	0.083	0.092	0.1029
10	He, P.R.	Yuli County, Korla City, Xinjiang	40°53′N	86°56′E	11	2417	58	Sandy soil	NA	NA	3342	12	300	One film, two tubes, four rows	Xinluzhong 66	NA	3	3	0.61	0.67	0.061	0.067	0.0938
			40°53′N	86°56′E	11	2417	58	Sandy soil	NA	NA	2531	7	300	One film, two tubes, four rows	Xinluzhong 66	NA	3	3	0.61	0.72	0.061	0.072	0.1658
			40°53′N	86°56′E	11	2417	58	Sandy soil	NA	NA	2271	5	300	One film, two tubes, four rows	Xinluzhong 66	NA	3	3	0.61	0.7	0.061	0.07	0.1376
			40°53′N	86°56′E	11	2417	58	Sandy soil	NA	NA	2011	4	300	One film, two tubes, four rows	Xinluzhong 66	NA	3	3	0.61	0.78	0.061	0.078	0.2458
11	Wang, F.et al.	Aksu National Field Scientific Observation and Research Station of Farmland Ecosystem, Chinese Academy of Sciences	40°37′N	80°51′E	11.3	NA	45.7	Sandy soil	NA	NA	2949	NA	194	One film, two tubes, six rows	NA	NA	3	3	2.24	3.11	0.224	0.311	0.3281
			40°37′N	80°51′E	11.3	NA	45.7	Sandy soil	NA	NA	2041	NA	194	One film, two tubes, six rows	NA	NA	3	3	2.24	4.36	0.224	0.436	0.666
			40°37′N	80°51′E	11.3	NA	45.7	Sandy soil	NA	NA	2993	NA	194	One film, two tubes, six rows	NA	NA	3	3	2.2	3.05	0.22	0.305	0.3267
			40°37′N	80°51′E	11.3	NA	45.7	Sandy soil	NA	NA	2070	NA	194	One film, two tubes, six rows	NA	NA	3	3	2.2	4.23	0.22	0.423	0.6537
12	Wu, L.F.et al.	Water-saving Irrigation Experimental Station of Xinjiang Academy of Agricultural and Reclamation Sciences	44°18′N	85°58′E	NA	NA	121	Sandy soil	10.44	79.76	2911	9	150	one film, three tubes, six rows	Xinluzao 33	NA	3	3	1.49	1.39	0.149	0.139	-0.0695
			44°18′N	85°58′E	NA	NA	121	Sandy soil	10.44	79.76	2911	9	200	one film, three tubes, six rows	Xinluzao 33	NA	3	3	1.53	1.46	0.153	0.146	-0.0468
			44°18′N	85°58′E	NA	NA	121	Sandy soil	10.44	79.76	2911	9	250	one film, three tubes, six rows	Xinluzao 33	NA	3	3	1.65	1.59	0.165	0.159	-0.037
			44°18′N	85°58′E	NA	NA	121	Sandy soil	10.44	79.76	2911	9	300	one film, three tubes, six rows	Xinluzao 33	NA	3	3	1.63	1.62	0.163	0.162	-0.0062
			44°18′N	85°58′E	NA	NA	121	Sandy soil	10.44	79.76	2911	9	350	one film, three tubes, six rows	Xinluzao 33	NA	3	3	1.62	1.59	0.162	0.159	-0.0187
			44°18′N	85°58′E	NA	NA	121	Sandy soil	10.44	79.76	2671	9	150	one film, three tubes, six rows	Xinluzao 33	NA	3	3	1.27	1.29	0.127	0.129	0.0156
			44°18′N	85°58′E	NA	NA	121	Sandy soil	10.44	79.76	2671	9	200	one film, three tubes, six rows	Xinluzao 33	NA	3	3	1.27	1.28	0.127	0.128	0.0078
			44°18′N	85°58′E	NA	NA	121	Sandy soil	10.44	79.76	2671	9	250	one film, three tubes, six rows	Xinluzao 33	NA	3	3	1.3	1.34	0.13	0.134	0.0303
			44°18′N	85°58′E	NA	NA	121	Sandy soil	10.44	79.76	2671	9	300	one film, three tubes, six rows	Xinluzao 33	NA	3	3	1.3	1.46	0.13	0.146	0.1161
			44°18′N	85°58′E	NA	NA	121	Sandy soil	10.44	79.76	2671	9	350	one film, three tubes, six rows	Xinluzao 33	NA	3	3	1.44	1.45	0.144	0.145	0.0069
			44°18′N	85°58′E	NA	NA	121	Sandy soil	10.44	79.76	3292	9	150	one film, three tubes, six rows	Xinluzao 33	NA	3	3	1.44	1.52	0.144	0.152	0.0541
			44°18′N	85°58′E	NA	NA	121	Sandy soil	10.44	79.76	3292	9	200	one film, three tubes, six rows	Xinluzao 33	NA	3	3	1.35	1.37	0.135	0.137	0.0147
			44°18′N	85°58′E	NA	NA	121	Sandy soil	10.44	79.76	3292	9	250	one film, three tubes, six rows	Xinluzao 33	NA	3	3	1.35	1.52	0.135	0.152	0.1186
			44°18′N	85°58′E	NA	NA	121	Sandy soil	10.44	79.76	3292	9	300	one film, three tubes, six rows	Xinluzao 33	NA	3	3	1.34	1.4	0.134	0.14	0.0438
			44°18′N	85°58′E	NA	NA	121	Sandy soil	10.44	79.76	3292	9	350	one film, three tubes, six rows	Xinluzao 33	NA	3	3	1.34	1.46	0.134	0.146	0.0858
13	Wu, L.F.et al.	Water-saving Irrigation Experimental Station of Xinjiang Academy of Agricultural and Reclamation Sciences	44°30′N	86°07′E	NA	NA	121	Sandy soil	NA	NA	2911	NA	150	one film, three tubes, six rows	Xinluzao 33	NA	3	3	1.49	1.38	0.03	0.05	-0.0767
			44°30′N	86°07′E	NA	NA	121	Sandy soil	NA	NA	2911	NA	200	one film, three tubes, six rows	Xinluzao 33	NA	3	3	1.53	1.46	0.01	0.04	-0.0468
			44°30′N	86°07′E	NA	NA	121	Sandy soil	NA	NA	2911	NA	250	one film, three tubes, six rows	Xinluzao 33	NA	3	3	1.65	1.59	0.05	0.02	-0.037
			44°30′N	86°07′E	NA	NA	121	Sandy soil	NA	NA	2911	NA	300	one film, three tubes, six rows	Xinluzao 33	NA	3	3	1.63	1.63	0.04	0.11	0
			44°30′N	86°07′E	NA	NA	121	Sandy soil	NA	NA	2911	NA	350	one film, three tubes, six rows	Xinluzao 33	NA	3	3	1.62	1.59	0.07	0.06	-0.0187
			44°30′N	86°07′E	NA	NA	121	Sandy soil	NA	NA	2671	NA	150	one film, three tubes, six rows	Xinluzao 33	NA	3	3	1.27	1.29	0.01	0	0.0156
			44°30′N	86°07′E	NA	NA	121	Sandy soil	NA	NA	2671	NA	200	one film, three tubes, six rows	Xinluzao 33	NA	3	3	1.3	1.34	0.01	0.02	0.0303
			44°30′N	86°07′E	NA	NA	121	Sandy soil	NA	NA	2671	NA	250	one film, three tubes, six rows	Xinluzao 33	NA	3	3	1.44	1.46	0.03	0.04	0.0138
			44°30′N	86°07′E	NA	NA	121	Sandy soil	NA	NA	2671	NA	300	one film, three tubes, six rows	Xinluzao 33	NA	3	3	1.25	1.37	0.02	0.01	0.0917
			44°30′N	86°07′E	NA	NA	121	Sandy soil	NA	NA	2671	NA	350	one film, three tubes, six rows	Xinluzao 33	NA	3	3	1.34	1.4	0.01	0.02	0.0438
			44°30′N	86°07′E	NA	NA	121	Sandy soil	NA	NA	3292	NA	150	one film, three tubes, six rows	Xinluzao 33	NA	3	3	1.27	1.28	0.01	0.02	0.0078
			44°30′N	86°07′E	NA	NA	121	Sandy soil	NA	NA	3292	NA	200	one film, three tubes, six rows	Xinluzao 33	NA	3	3	1.3	1.46	0.01	0.02	0.1161
			44°30′N	86°07′E	NA	NA	121	Sandy soil	NA	NA	3292	NA	250	one film, three tubes, six rows	Xinluzao 33	NA	3	3	1.44	1.52	0.03	0.05	0.0541
			44°30′N	86°07′E	NA	NA	121	Sandy soil	NA	NA	3292	NA	300	one film, three tubes, six rows	Xinluzao 33	NA	3	3	1.25	1.52	0.02	0.02	0.1956
			44°30′N	86°07′E	NA	NA	121	Sandy soil	NA	NA	3292	NA	350	one film, three tubes, six rows	Xinluzao 33	NA	3	3	1.34	1.46	0.01	0.03	0.0858
14	Li, Z.J.et al.	Field Observation and Experimental Station of Crop Efficient Water Use of the Ministry of Agriculture of Shihezi, Xinjiang	44°20′N	85°20′E	NA	NA	121	Sandy soil	10.44	79.76	2611	NA	150	one film, three tubes, six rows	Xinken 1	NA	3	3	1.14	1.19	0.114	0.119	0.0429
			44°20′N	85°20′E	NA	NA	121	Sandy soil	10.44	79.76	2611	NA	200	one film, three tubes, six rows	Xinken 1	NA	3	3	1.13	1.22	0.113	0.122	0.0766
			44°20′N	85°20′E	NA	NA	121	Sandy soil	10.44	79.76	2611	NA	250	one film, three tubes, six rows	Xinken 1	NA	3	3	1.5	1.38	0.15	0.138	-0.0834
			44°20′N	85°20′E	NA	NA	121	Sandy soil	10.44	79.76	2611	NA	300	one film, three tubes, six rows	Xinken 1	NA	3	3	1.57	1.72	0.157	0.172	0.0912
			44°20′N	85°20′E	NA	NA	121	Sandy soil	10.44	79.76	2611	NA	350	one film, three tubes, six rows	Xinken 1	NA	3	3	1.34	1.47	0.134	0.147	0.0926
			44°20′N	85°20′E	NA	NA	121	Sandy soil	10.44	79.76	3282	NA	150	one film, three tubes, six rows	Xinken 1	NA	3	3	1.14	1.16	0.114	0.116	0.0174
			44°20′N	85°20′E	NA	NA	121	Sandy soil	10.44	79.76	3282	NA	200	one film, three tubes, six rows	Xinken 1	NA	3	3	1.13	1.24	0.113	0.124	0.0929
			44°20′N	85°20′E	NA	NA	121	Sandy soil	10.44	79.76	3282	NA	250	one film, three tubes, six rows	Xinken 1	NA	3	3	1.5	1.44	0.15	0.144	-0.0408
			44°20′N	85°20′E	NA	NA	121	Sandy soil	10.44	79.76	3282	NA	300	one film, three tubes, six rows	Xinken 1	NA	3	3	1.57	1.68	0.157	0.168	0.0677
			44°20′N	85°20′E	NA	NA	121	Sandy soil	10.44	79.76	3282	NA	350	one film, three tubes, six rows	Xinken 1	NA	3	3	1.34	1.54	0.134	0.154	0.1391
15	Shi, H.L.	Xinjiang Aksu Awati County Harvest 2 Harvest 1 Lian Xinjiang Academy of Agricultural Sciences Economic Workshop	40°38′N	80°22′E	NA	NA	NA	Loam	NA	NA	2800	10	0	NA	Xinluzhong54	24.25	3	3	0.96	1.21	0.096	0.121	0.2314
			40°38′N	80°22′E	NA	NA	NA	Loam	NA	NA	2800	10	150	NA	Xinluzhong54	24.25	3	3	1.22	1.66	0.122	0.166	0.308
			40°38′N	80°22′E	NA	NA	NA	Loam	NA	NA	2800	10	300	NA	Xinluzhong54	24.25	3	3	1.52	2.05	0.152	0.205	0.2991
			40°38′N	80°22′E	NA	NA	NA	Loam	NA	NA	2800	10	450	NA	Xinluzhong54	24.25	3	3	1.46	1.95	0.146	0.195	0.2894
16	Li, Y.Y.	Experimental base of soil improvement station in Shihezi Fort Town, Xinjiang	44°49′N	85°34′E	NA	1900	150	NA	4.3442	80	2850	8	NA	One film, one tube, four rows	NA	24.75	3	3	9.68	1.067	0.968	0.1067	-2.2052
17	Wang, H.D.	Shihezi City, Xinjiang Academy of Agricultural Reclamation Sciences Test Site	44°20′N	85°20′E	NA	NA	121	Sandy soil	10.44	79.76	2611	9	150	one film, three tubes, six rows	Xinken 1	NA	3	3	1.14	1.19	0.114	0.119	0.0429
			44°20′N	85°20′E	NA	NA	121	Sandy soil	10.44	79.76	2611	9	200	one film, three tubes, six rows	Xinken 1	NA	3	3	1.13	1.22	0.113	0.122	0.0766
			44°20′N	85°20′E	NA	NA	121	Sandy soil	10.44	79.76	2611	9	250	one film, three tubes, six rows	Xinken 1	NA	3	3	1.5	1.38	0.15	0.138	-0.0834
			44°20′N	85°20′E	NA	NA	121	Sandy soil	10.44	79.76	2611	9	300	one film, three tubes, six rows	Xinken 1	NA	3	3	1.57	1.72	0.157	0.172	0.0912
			44°20′N	85°20′E	NA	NA	121	Sandy soil	10.44	79.76	2611	9	350	one film, three tubes, six rows	Xinken 1	NA	3	3	1.34	1.47	0.134	0.147	0.0926
			44°20′N	85°20′E	NA	NA	121	Sandy soil	10.44	79.76	3282	9	150	one film, three tubes, six rows	Xinken 1	NA	3	3	1.14	1.16	0.114	0.116	0.0174
			44°20′N	85°20′E	NA	NA	121	Sandy soil	10.44	79.76	3282	9	200	one film, three tubes, six rows	Xinken 1	NA	3	3	1.13	1.24	0.113	0.124	0.0929
			44°20′N	85°20′E	NA	NA	121	Sandy soil	10.44	79.76	3282	9	250	one film, three tubes, six rows	Xinken 1	NA	3	3	1.5	1.44	0.15	0.144	-0.0408
			44°20′N	85°20′E	NA	NA	121	Sandy soil	10.44	79.76	3282	9	300	one film, three tubes, six rows	Xinken 1	NA	3	3	1.57	1.68	0.157	0.168	0.0677
			44°20′N	85°20′E	NA	NA	121	Sandy soil	10.44	79.76	3282	9	350	one film, three tubes, six rows	Xinken 1	NA	3	3	1.34	1.54	0.134	0.154	0.1391
18	Wu，L.F.	Xinjiang Agricultural Star Academy of Sciences Water-saving Irrigation Experimental Station	43°57′N	87°29′E	NA	NA	121	Sandy soil	10.44	79.76	2911	9	150	one film, three tubes, six rows	Xinluzao 33	NA	3	3	1.49	1.39	0.03	0.05	-0.0695
			43°57′N	87°29′E	NA	NA	121	Sandy soil	10.44	79.76	2911	9	200	one film, three tubes, six rows	Xinluzao 33	NA	3	3	1.53	1.46	0	0.06	-0.0468
			43°57′N	87°29′E	NA	NA	121	Sandy soil	10.44	79.76	2911	9	250	one film, three tubes, six rows	Xinluzao 33	NA	3	3	1.65	1.6	0.06	0.03	-0.0308
			43°57′N	87°29′E	NA	NA	121	Sandy soil	10.44	79.76	2911	9	300	one film, three tubes, six rows	Xinluzao 33	NA	3	3	1.63	1.62	0.05	0.09	-0.0062
			43°57′N	87°29′E	NA	NA	121	Sandy soil	10.44	79.76	2911	9	350	one film, three tubes, six rows	Xinluzao 33	NA	3	3	1.62	1.6	0.07	0.07	-0.0124
			43°57′N	87°29′E	NA	NA	121	Sandy soil	10.44	79.76	2671	9	150	one film, three tubes, six rows	Xinluzao 33	NA	3	3	1.28	1.29	0.01	0	0.0078
			43°57′N	87°29′E	NA	NA	121	Sandy soil	10.44	79.76	2671	9	200	one film, three tubes, six rows	Xinluzao 33	NA	3	3	1.31	1.35	0	0.03	0.0301
			43°57′N	87°29′E	NA	NA	121	Sandy soil	10.44	79.76	2671	9	250	one film, three tubes, six rows	Xinluzao 33	NA	3	3	1.45	1.45	0.04	0.03	0
			43°57′N	87°29′E	NA	NA	121	Sandy soil	10.44	79.76	2671	9	300	one film, three tubes, six rows	Xinluzao 33	NA	3	3	1.27	1.37	0.04	0	0.0758
			43°57′N	87°29′E	NA	NA	121	Sandy soil	10.44	79.76	2671	9	350	one film, three tubes, six rows	Xinluzao 33	NA	3	3	1.34	1.4	0	0.01	0.0438
			43°57′N	87°29′E	NA	NA	121	Sandy soil	10.44	79.76	3292	9	150	one film, three tubes, six rows	Xinluzao 33	NA	3	3	1.28	1.28	0.01	0.01	0
			43°57′N	87°29′E	NA	NA	121	Sandy soil	10.44	79.76	3292	9	200	one film, three tubes, six rows	Xinluzao 33	NA	3	3	1.31	1.47	0	0.03	0.1152
			43°57′N	87°29′E	NA	NA	121	Sandy soil	10.44	79.76	3292	9	250	one film, three tubes, six rows	Xinluzao 33	NA	3	3	1.45	1.52	0.04	0.05	0.0471
			43°57′N	87°29′E	NA	NA	121	Sandy soil	10.44	79.76	3292	9	300	one film, three tubes, six rows	Xinluzao 33	NA	3	3	1.27	1.52	0.04	0.01	0.1797
			43°57′N	87°29′E	NA	NA	121	Sandy soil	10.44	79.76	3292	9	350	one film, three tubes, six rows	Xinluzao 33	NA	3	3	1.34	1.47	0	0.03	0.0926
19	Li, X.X.et al.	Shihezi Irrigation District, Xinjiang	43°21′N	84°43′E	7.85	1991.5	225	NA	10.846	67.53	3602	10	210	NA	NA	NA	3	3	1.58	1.48	0.158	0.148	-0.0654
			43°21′N	84°43′E	7.85	1991.5	225	NA	10.846	67.53	3602	10	280	NA	NA	NA	3	3	1.75	1.7	0.175	0.17	-0.029
			43°21′N	84°43′E	7.85	1991.5	225	NA	10.846	67.53	3602	10	350	NA	NA	NA	3	3	1.7	1.57	0.17	0.157	-0.0796
20	Hou, X.H.et al.	located in Korla, Xinjiang, China	40°53′N	86°56′E	11	NA	56	Sandy soil	NA	NA	2193	8	NA	NA	NA	22.5	3	3	1.13	1.44	0.01	0.01	0.2424
			40°53′N	86°56′E	11	NA	56	Sandy soil	NA	NA	2814	8	NA	NA	NA	22.5	3	3	1.13	1.35	0.01	0.01	0.1779
			40°53′N	86°56′E	11	NA	56	Sandy soil	NA	NA	3435	8	NA	NA	NA	22.5	3	3	1.13	1.25	0.01	0.03	0.1009
			40°53′N	86°56′E	11	NA	56	Sandy soil	NA	NA	1963	8	NA	NA	NA	22.5	3	3	1.24	1.55	0	0.02	0.2231
			40°53′N	86°56′E	11	NA	56	Sandy soil	NA	NA	2567	8	NA	NA	NA	22.5	3	3	1.24	1.5	0	0.02	0.1904
			40°53′N	86°56′E	11	NA	56	Sandy soil	NA	NA	3171	8	NA	NA	NA	22.5	3	3	1.24	1.38	0	0.03	0.107
21	Wang, H.D.et al.	Test Station of the Xinjiang Academy of Agricultural Reclamation Sciences in Shihezi, Xinjiang Province, China.	44°18′N	85°58′E	NA	NA	121	Sandy soil	10.44	79.76	2911	9	150	One film, three tubes, six rows	Xinluzao 33	NA	3	3	1.49	1.39	0.149	0.139	-0.0695
			44°18′N	85°58′E	NA	NA	121	Sandy soil	10.44	79.76	2911	9	200	One film, three tubes, six rows	Xinluzao 33	NA	3	3	1.53	1.46	0.153	0.146	-0.0468
			44°18′N	85°58′E	NA	NA	121	Sandy soil	10.44	79.76	2911	9	250	One film, three tubes, six rows	Xinluzao 33	NA	3	3	1.65	1.59	0.165	0.159	-0.037
			44°18′N	85°58′E	NA	NA	121	Sandy soil	10.44	79.76	2911	9	300	One film, three tubes, six rows	Xinluzao 33	NA	3	3	1.63	1.62	0.163	0.162	-0.0062
			44°18′N	85°58′E	NA	NA	121	Sandy soil	10.44	79.76	2911	9	350	One film, three tubes, six rows	Xinluzao 33	NA	3	3	1.62	1.59	0.162	0.159	-0.0187
			44°18′N	85°58′E	NA	NA	121	Sandy soil	10.44	79.76	3302	9	150	One film, three tubes, six rows	Xinluzao 33	NA	3	3	1.27	1.28	0.127	0.128	0.0078
			44°18′N	85°58′E	NA	NA	121	Sandy soil	10.44	79.76	2671	9	200	One film, three tubes, six rows	Xinluzao 33	NA	3	3	1.27	1.29	0.127	0.129	0.0156
			44°18′N	85°58′E	NA	NA	121	Sandy soil	10.44	79.76	3302	9	250	One film, three tubes, six rows	Xinluzao 33	NA	3	3	1.3	1.46	0.13	0.146	0.1161
			44°18′N	85°58′E	NA	NA	121	Sandy soil	10.44	79.76	2671	9	300	One film, three tubes, six rows	Xinluzao 33	NA	3	3	1.3	1.34	0.13	0.134	0.0303
			44°18′N	85°58′E	NA	NA	121	Sandy soil	10.44	79.76	3302	9	350	One film, three tubes, six rows	Xinluzao 33	NA	3	3	1.44	1.52	0.144	0.152	0.0541
			44°18′N	85°58′E	NA	NA	121	Sandy soil	10.44	79.76	2671	9	150	One film, three tubes, six rows	Xinluzao 33	NA	3	3	1.44	1.45	0.144	0.145	0.0069
			44°18′N	85°58′E	NA	NA	121	Sandy soil	10.44	79.76	3302	9	200	One film, three tubes, six rows	Xinluzao 33	NA	3	3	1.35	1.52	0.135	0.152	0.1186
			44°18′N	85°58′E	NA	NA	121	Sandy soil	10.44	79.76	2671	9	250	One film, three tubes, six rows	Xinluzao 33	NA	3	3	1.35	1.37	0.135	0.137	0.0147
			44°18′N	85°58′E	NA	NA	121	Sandy soil	10.44	79.76	3302	9	300	One film, three tubes, six rows	Xinluzao 33	NA	3	3	1.34	1.46	0.134	0.146	0.0858
			44°18′N	85°58′E	NA	NA	121	Sandy soil	10.44	79.76	2671	9	350	One film, three tubes, six rows	Xinluzao 33	NA	3	3	1.34	1.4	0.134	0.14	0.0438
			44°18′N	85°58′E	NA	NA	121	Sandy soil	10.44	79.76	3282	9	150	One film, three tubes, six rows	Xinken 1	NA	3	3	1.14	1.16	0.114	0.116	0.0174
			44°18′N	85°58′E	NA	NA	121	Sandy soil	10.44	79.76	2611	9	200	One film, three tubes, six rows	Xinken 1	NA	3	3	1.14	1.19	0.114	0.119	0.0429
			44°18′N	85°58′E	NA	NA	121	Sandy soil	10.44	79.76	3282	9	250	One film, three tubes, six rows	Xinken 1	NA	3	3	1.13	1.24	0.113	0.124	0.0929
			44°18′N	85°58′E	NA	NA	121	Sandy soil	10.44	79.76	2611	9	300	One film, three tubes, six rows	Xinken 1	NA	3	3	1.13	1.22	0.113	0.122	0.0766
			44°18′N	85°58′E	NA	NA	121	Sandy soil	10.44	79.76	3282	9	350	One film, three tubes, six rows	Xinken 1	NA	3	3	1.5	1.44	0.15	0.144	-0.0408
			44°18′N	85°58′E	NA	NA	121	Sandy soil	10.44	79.76	2611	9	150	One film, three tubes, six rows	Xinken 1	NA	3	3	1.5	1.38	0.15	0.138	-0.0834
			44°18′N	85°58′E	NA	NA	121	Sandy soil	10.44	79.76	3282	9	200	One film, three tubes, six rows	Xinken 1	NA	3	3	1.57	1.68	0.157	0.168	0.0677
			44°18′N	85°58′E	NA	NA	121	Sandy soil	10.44	79.76	2611	9	250	One film, three tubes, six rows	Xinken 1	NA	3	3	1.57	1.72	0.157	0.172	0.0912
			44°18′N	85°58′E	NA	NA	121	Sandy soil	10.44	79.76	3282	9	300	One film, three tubes, six rows	Xinken 1	NA	3	3	1.34	1.54	0.134	0.154	0.1391
			44°18′N	85°58′E	NA	NA	121	Sandy soil	10.44	79.76	2611	9	350	One film, three tubes, six rows	Xinken 1	NA	3	3	1.34	1.47	0.134	0.147	0.0926
22	He, P.R.et al.	Korla city, Xinjiang	40°53′N	86°56′E	NA	2417	135.4	Sandy soil	NA	NA	3338	10	300	NA	Xinluzhong 66	NA	3	3	1.29	1.43	0.129	0.143	0.103
			40°53′N	86°56′E	NA	2417	135.4	Sandy soil	NA	NA	2530	6	300	NA	Xinluzhong 66	NA	3	3	1.29	1.54	0.129	0.154	0.1771
			40°53′N	86°56′E	NA	2417	135.4	Sandy soil	NA	NA	2267	4	300	NA	Xinluzhong 66	NA	3	3	1.29	1.52	0.129	0.152	0.1641
			40°53′N	86°56′E	NA	2417	135.4	Sandy soil	NA	NA	2018	3	300	NA	Xinluzhong 66	NA	3	3	1.29	1.67	0.129	0.167	0.2582
23	Hou, X.H.et al.	Experimental station located in Korla, Xinjiang, China	40°53′N	86°56′E	11	NA	56	Sandy soil	NA	NA	2193	8	250	NA	NA	NA	3	3	1.01	1.26	0.101	0.126	0.2212
			40°53′N	86°56′E	11	NA	56	Sandy soil	NA	NA	2814	8	250	NA	NA	NA	3	3	1.01	1.21	0.101	0.121	0.1807
			40°53′N	86°56′E	11	NA	56	Sandy soil	NA	NA	3435	8	250	NA	NA	NA	3	3	1.01	1.13	0.101	0.113	0.1123
			40°53′N	86°56′E	11	NA	56	Sandy soil	NA	NA	2193	8	300	NA	NA	NA	3	3	1.07	1.34	0.107	0.134	0.225
			40°53′N	86°56′E	11	NA	56	Sandy soil	NA	NA	2814	8	300	NA	NA	NA	3	3	1.07	1.29	0.107	0.129	0.187
			40°53′N	86°56′E	11	NA	56	Sandy soil	NA	NA	3435	8	300	NA	NA	NA	3	3	1.07	1.19	0.107	0.119	0.1063
			40°53′N	86°56′E	11	NA	56	Sandy soil	NA	NA	2193	8	350	NA	NA	NA	3	3	1.13	1.43	0.113	0.143	0.2355
			40°53′N	86°56′E	11	NA	56	Sandy soil	NA	NA	2814	8	350	NA	NA	NA	3	3	1.13	1.36	0.113	0.136	0.1853
			40°53′N	86°56′E	11	NA	56	Sandy soil	NA	NA	3435	8	350	NA	NA	NA	3	3	1.13	1.26	0.113	0.126	0.1089
			40°53′N	86°56′E	11	NA	56	Sandy soil	NA	NA	2193	8	400	NA	NA	NA	3	3	1.12	1.41	0.112	0.141	0.2303
			40°53′N	86°56′E	11	NA	56	Sandy soil	NA	NA	2814	8	400	NA	NA	NA	3	3	1.12	1.35	0.112	0.135	0.1868
			40°53′N	86°56′E	11	NA	56	Sandy soil	NA	NA	3435	8	400	NA	NA	NA	3	3	1.12	1.24	0.112	0.124	0.1018
			40°53′N	86°56′E	11	NA	56	Sandy soil	NA	NA	1963	8	250	NA	NA	NA	3	3	1	1.19	0.1	0.119	0.174
			40°53′N	86°56′E	11	NA	56	Sandy soil	NA	NA	2567	8	250	NA	NA	NA	3	3	1	1.17	0.1	0.117	0.157
			40°53′N	86°56′E	11	NA	56	Sandy soil	NA	NA	3171	8	250	NA	NA	NA	3	3	1	1.13	0.1	0.113	0.1222
			40°53′N	86°56′E	11	NA	56	Sandy soil	NA	NA	1963	8	300	NA	NA	NA	3	3	1.06	1.29	0.106	0.129	0.1964
			40°53′N	86°56′E	11	NA	56	Sandy soil	NA	NA	2567	8	300	NA	NA	NA	3	3	1.06	1.27	0.106	0.127	0.1807
			40°53′N	86°56′E	11	NA	56	Sandy soil	NA	NA	3171	8	300	NA	NA	NA	3	3	1.06	1.17	0.106	0.117	0.0987
			40°53′N	86°56′E	11	NA	56	Sandy soil	NA	NA	1963	8	350	NA	NA	NA	3	3	1.11	1.4	0.111	0.14	0.2321
			40°53′N	86°56′E	11	NA	56	Sandy soil	NA	NA	2567	8	350	NA	NA	NA	3	3	1.11	1.33	0.111	0.133	0.1808
			40°53′N	86°56′E	11	NA	56	Sandy soil	NA	NA	3171	8	350	NA	NA	NA	3	3	1.11	1.24	0.111	0.124	0.1108
			40°53′N	86°56′E	11	NA	56	Sandy soil	NA	NA	1963	8	400	NA	NA	NA	3	3	1.1	1.41	0.11	0.141	0.2483
			40°53′N	86°56′E	11	NA	56	Sandy soil	NA	NA	2567	8	400	NA	NA	NA	3	3	1.1	1.3	0.11	0.13	0.1671
			40°53′N	86°56′E	11	NA	56	Sandy soil	NA	NA	3171	8	400	NA	NA	NA	3	3	1.1	1.22	0.11	0.122	0.1035
